# Supplementary material for: Synthesis of Isomeric 3-Benzazecines Decorated with Endocyclic Allene Moiety and Exocyclic Conjugated Double Bond and Evaluation of Their Anticholinesterase Activity
Source: MDPI journal article supplement (doi:10.3390/molecules27196276), 2022-09-23
Supplement: s1 [file s1]

## Supporting Information

# Synthesis of isomeric 3-benzazecines decorated with endocyclic allene moiety and exocyclic conjugated double bond and evaluation of their anti-cholinesterase activity

Alexander A. Titov <sup>1,¶</sup>, Rosa Purgatorio <sup>2,¶</sup>, Arina Y. Obydennik <sup>1</sup>, Anna V. Listratova <sup>1</sup>, Tatiana N. Borisova <sup>1</sup>, Modesto de Candia <sup>2</sup>, Marco Catto <sup>2</sup>, Cosimo D. Altomare <sup>2,\*</sup>, Alexey V. Varlamov <sup>1</sup> and Leonid G. Voskressensky <sup>1</sup>

<sup>1</sup> Organic Chemistry Department, Peoples' Friendship University of Russia (RUDN University), 6 Miklukho-Maklaya St, Moscow, 117198, Russian Federation

<sup>2</sup> Department of Pharmacy-Pharmaceutical Sciences, University of Bari Aldo Moro, Via E. Orabona 4, 70125 Bari, Italy;

\* Correspondence: cosimodamiano.altomare@uniba.it; Tel.: +39-080-5442781

¶ These authors equally contributed

---

## Table of content

|                                                               |   |
|---------------------------------------------------------------|---|
| Copies of <sup>1</sup> H and <sup>13</sup> C NMR spectra..... | 2 |
|---------------------------------------------------------------|---|

# Copies of $^1\text{H}$ and $^{13}\text{C}$ NMR spectra

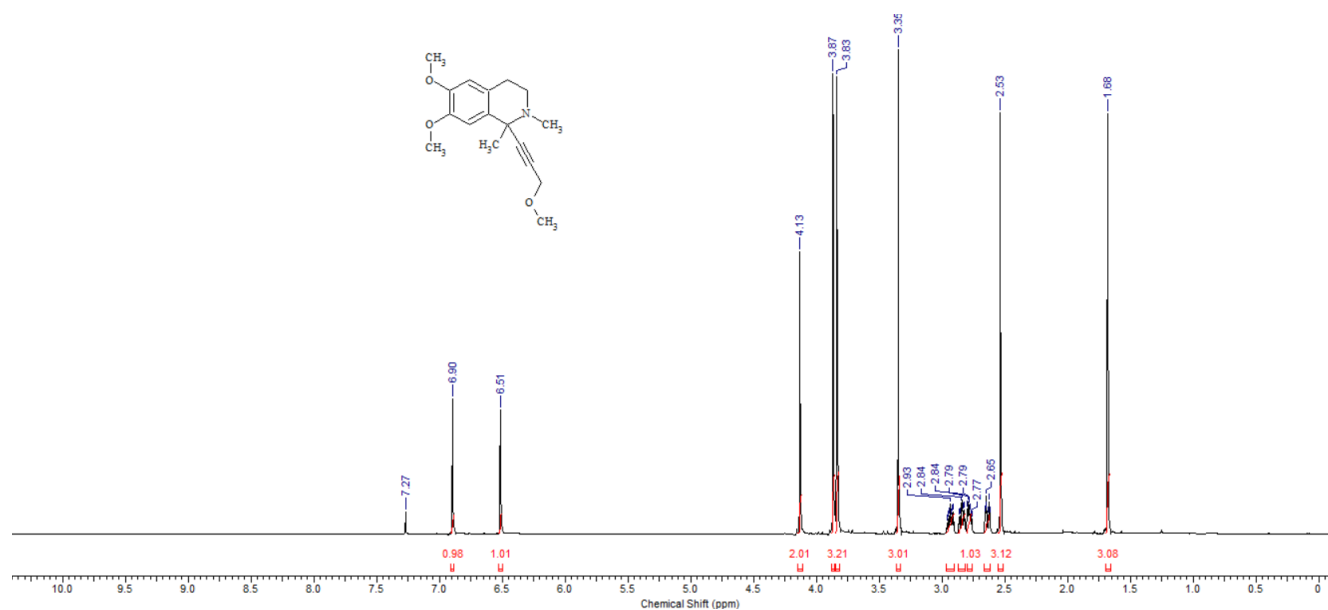

**Figure S1:**  $^1\text{H}$  NMR spectrum of compound 2a

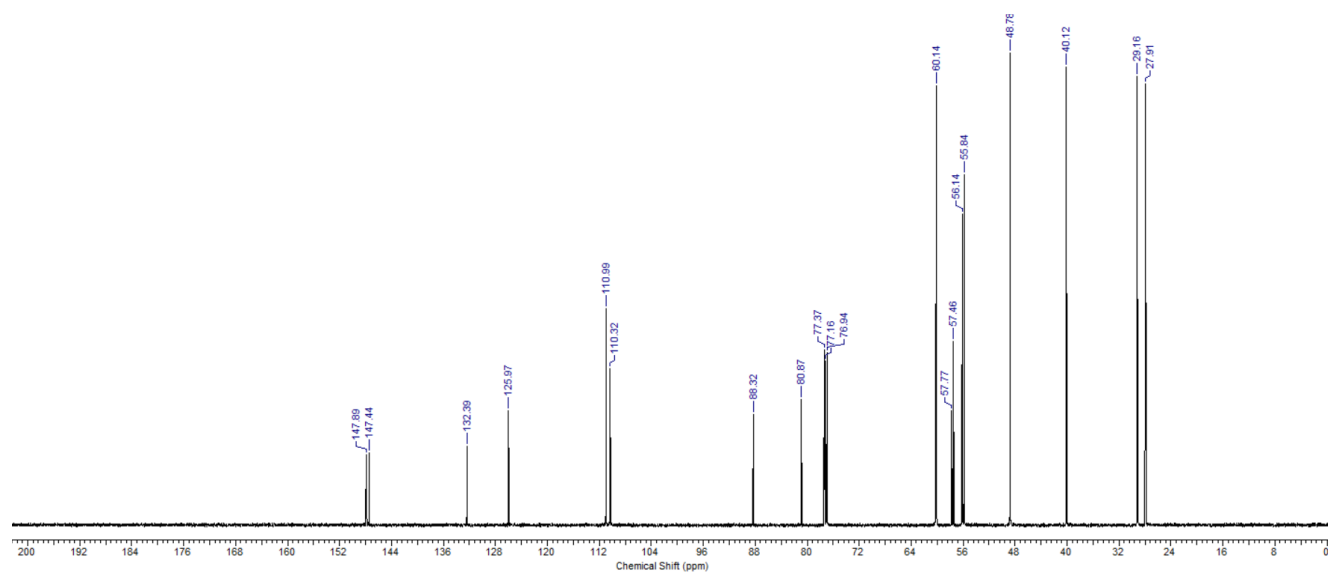

**Figure S2:**  $^{13}\text{C}$  NMR spectrum of compound 2a

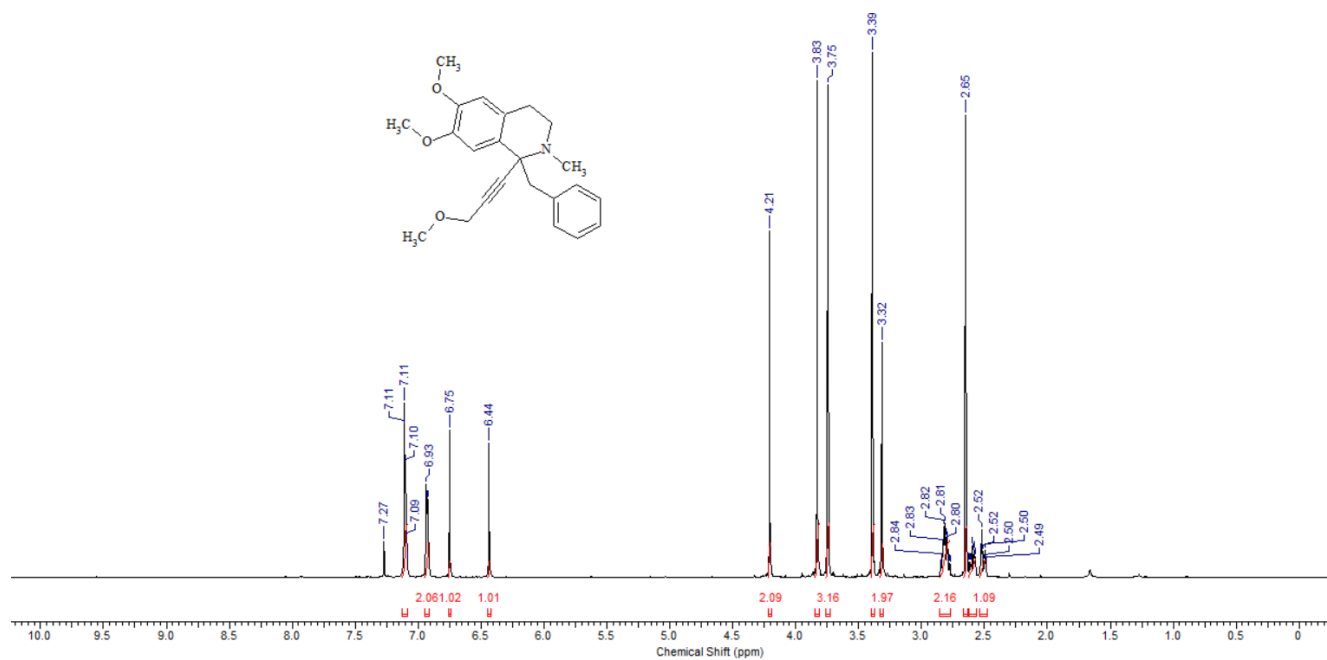

**Figure S3:**  $^1\text{H}$  NMR spectrum of compound **2b**

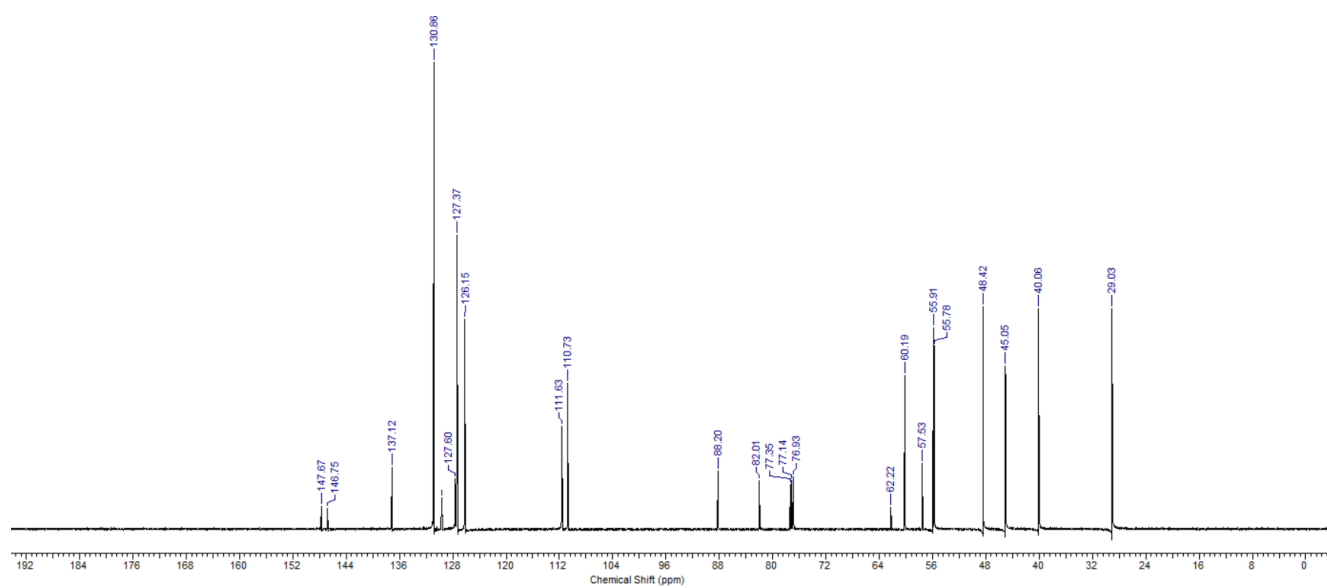

**Figure S4:**  $^{13}\text{C}$  NMR spectrum of compound **2b**

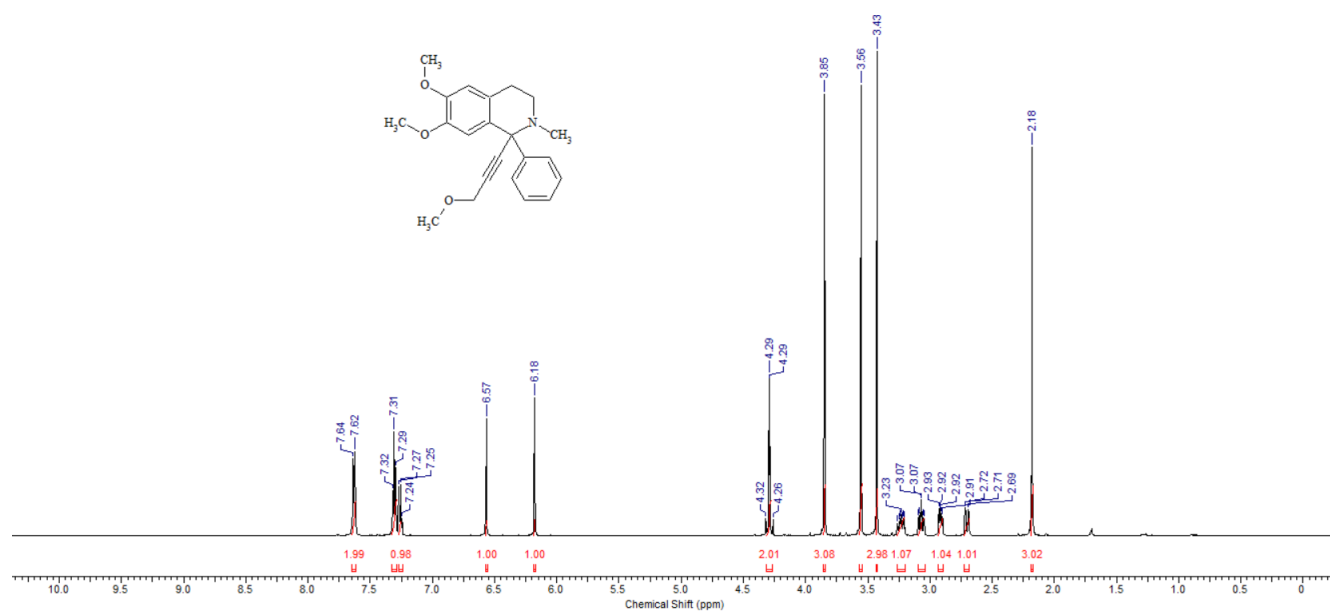

**Figure S5:** <sup>1</sup>H NMR spectrum of compound **2c**

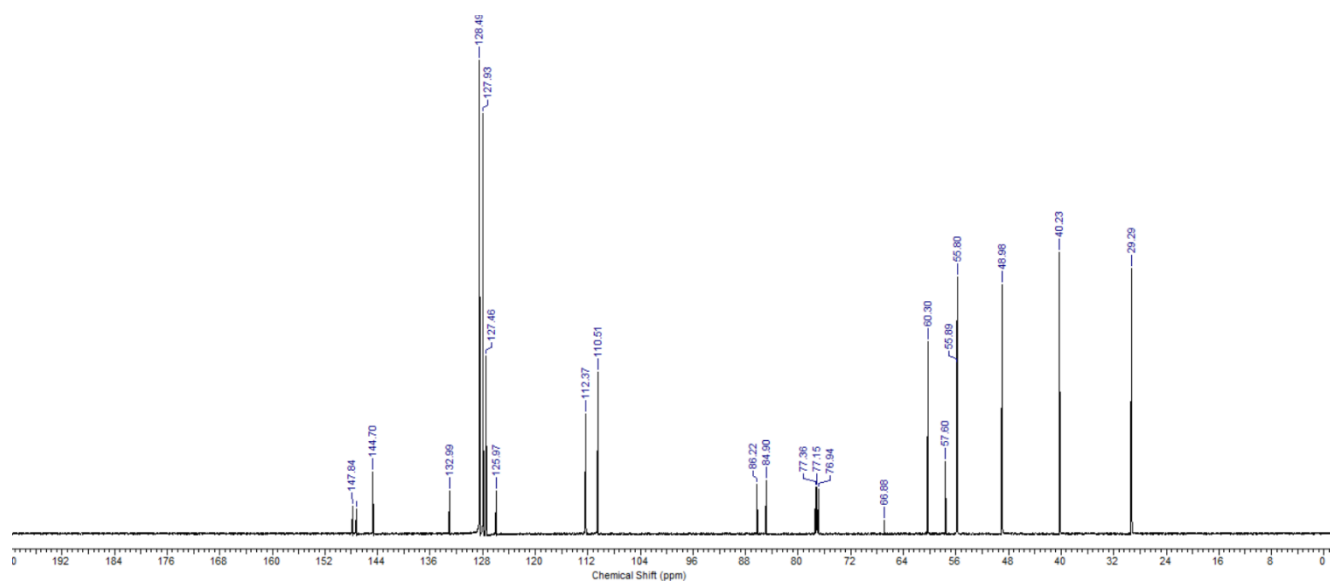

**Figure S6:** <sup>13</sup>C NMR spectrum of compound **2c**

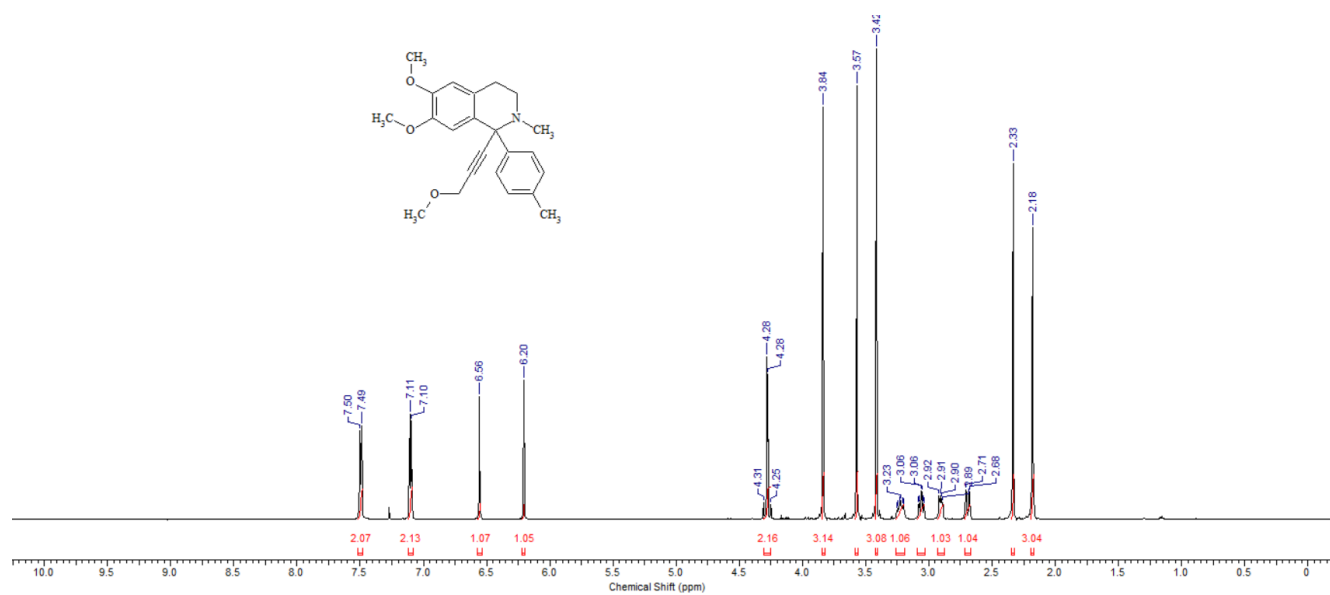

**Figure S7:**  $^1\text{H}$  NMR spectrum of compound **2d**

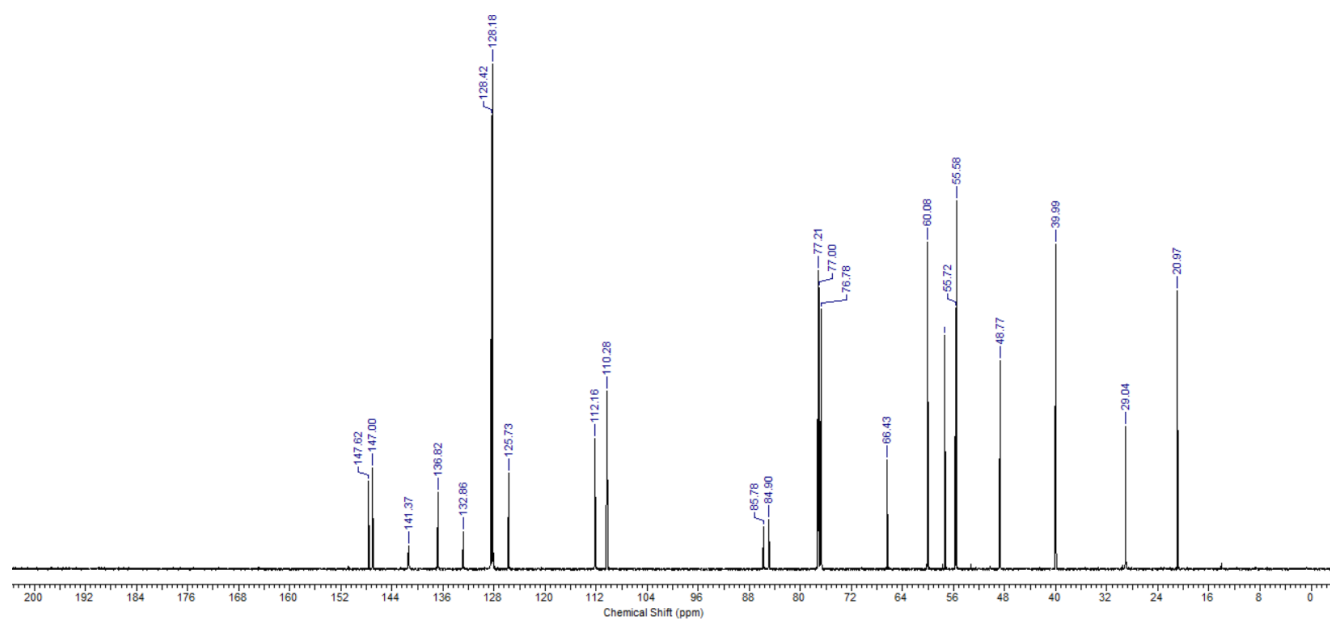

**Figure S8:**  $^{13}\text{C}$  NMR spectrum of compound **2d**

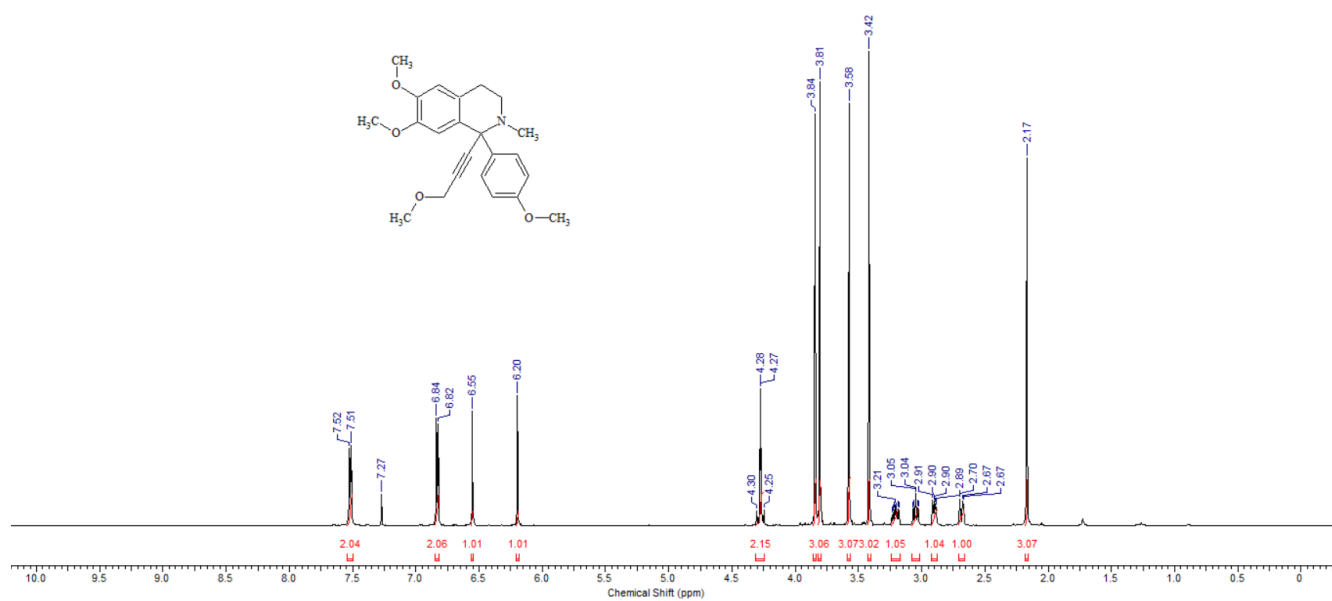

**Figure S9:**  $^1\text{H}$  NMR spectrum of compound **2e**

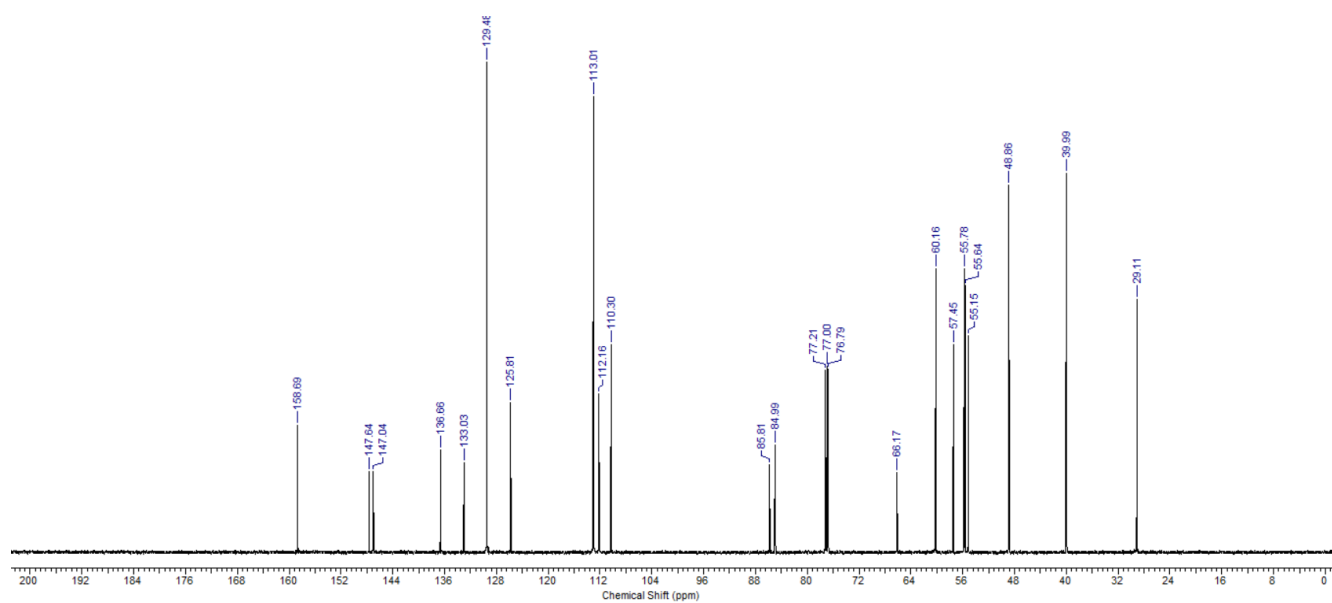

**Figure S10:**  $^{13}\text{C}$  NMR spectrum of compound **2e**

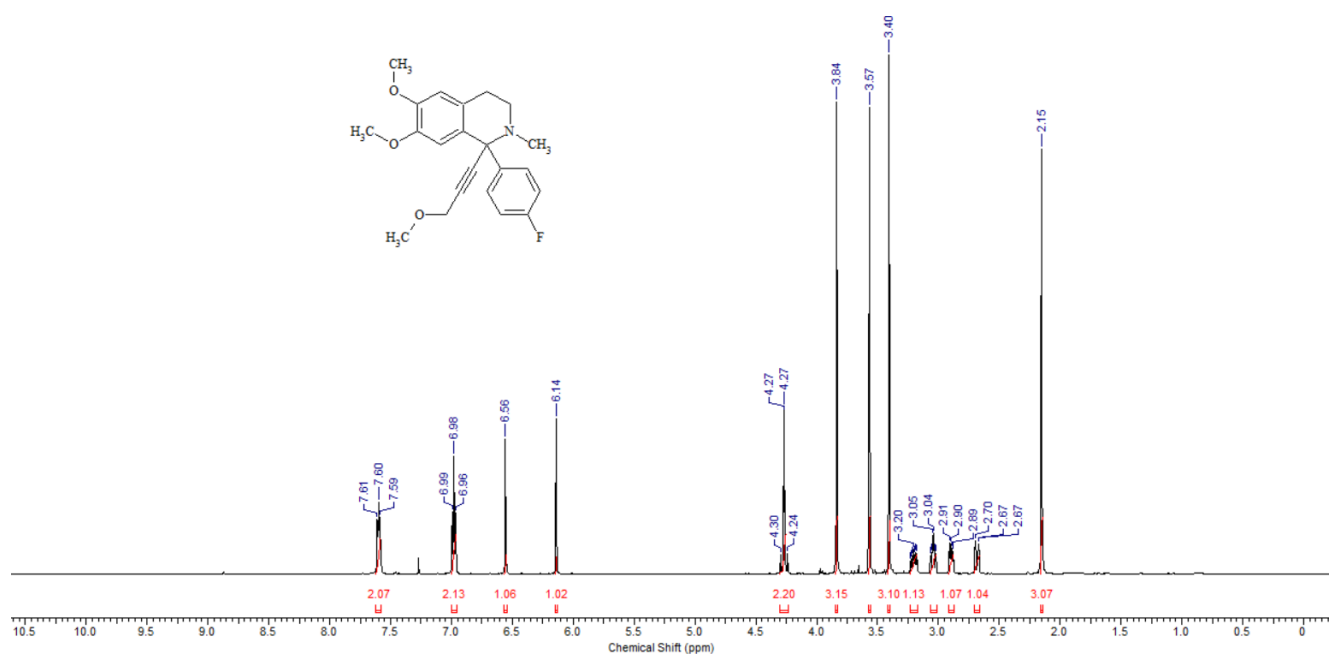

**Figure S11:**  $^1\text{H}$  NMR spectrum of compound **2f**

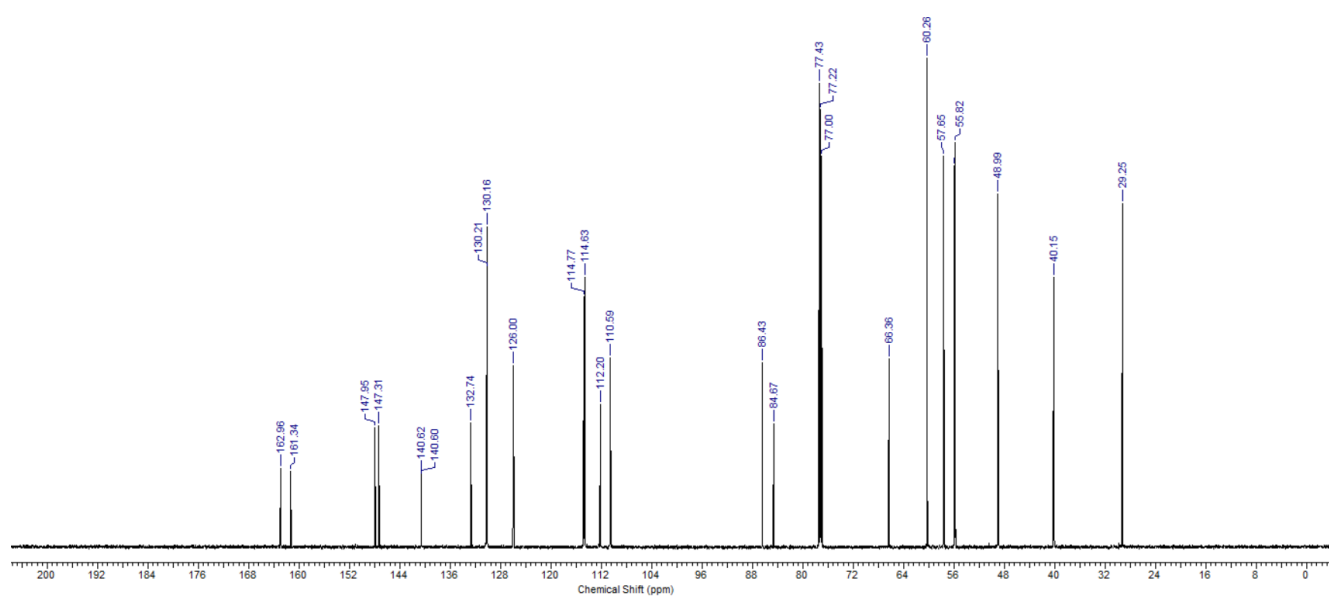

**Figure S12:**  $^{13}\text{C}$  NMR spectrum of compound **2f**

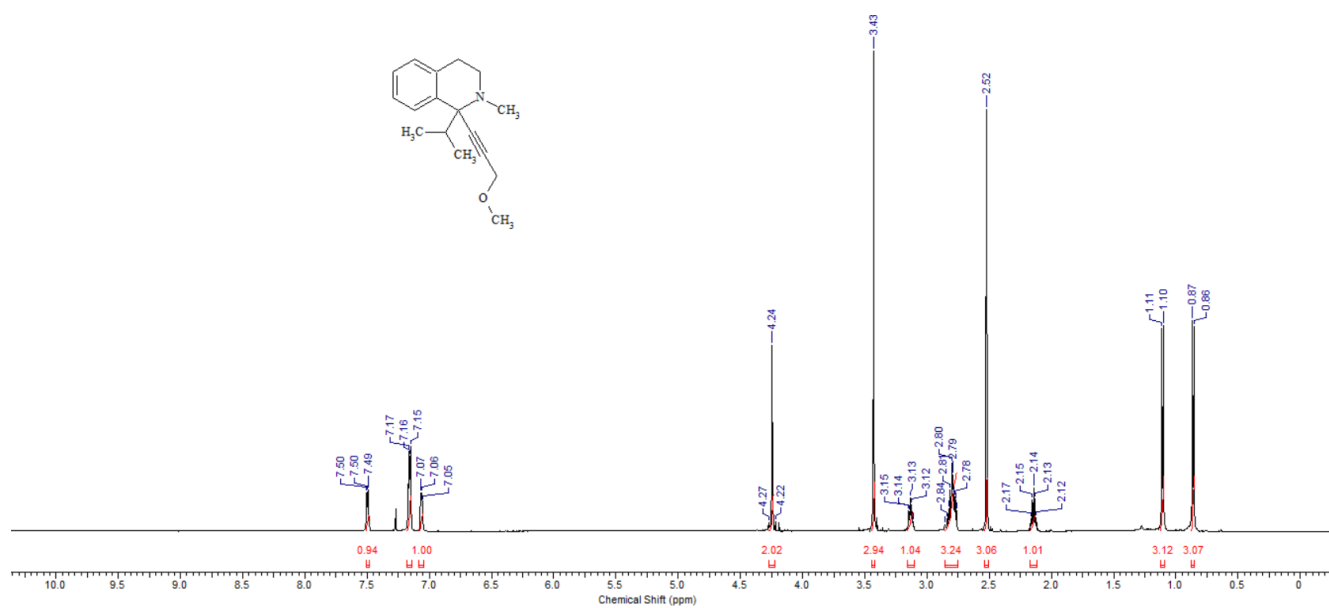

**Figure S13:**  $^1\text{H}$  NMR spectrum of compound **2g**

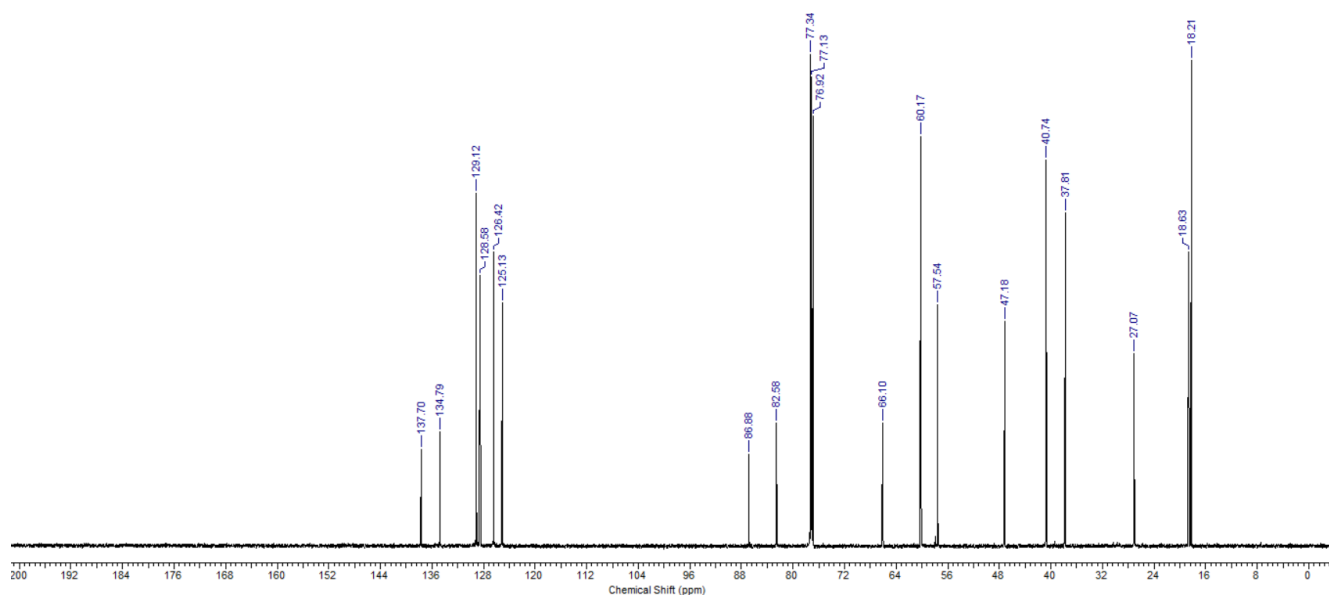

**Figure S14:**  $^{13}\text{C}$  NMR spectrum of compound **2g**



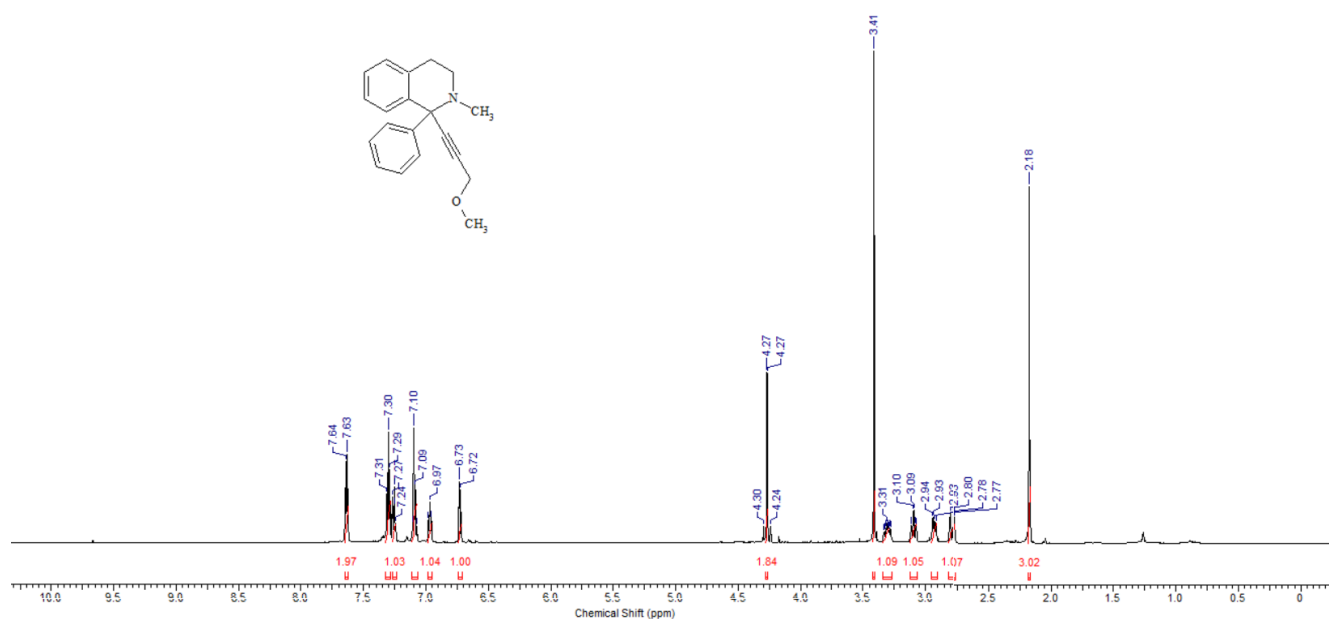

**Figure S15:** <sup>1</sup>H NMR spectrum of compound **2h**

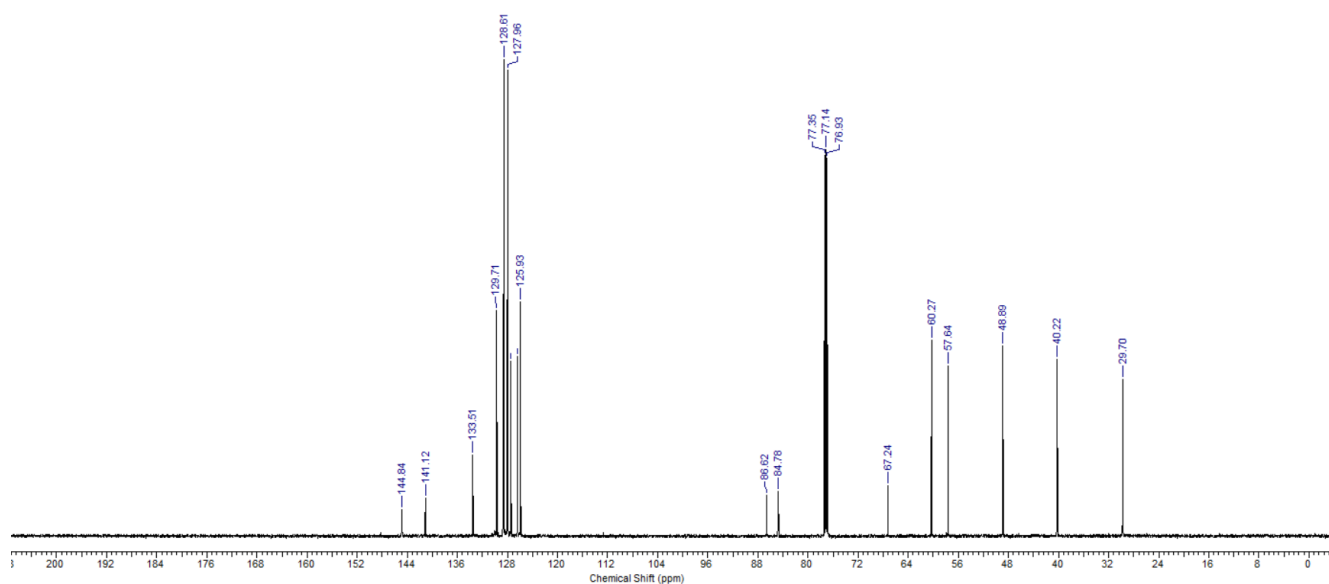

**Figure S16:** <sup>13</sup>C NMR spectrum of compound **2h**

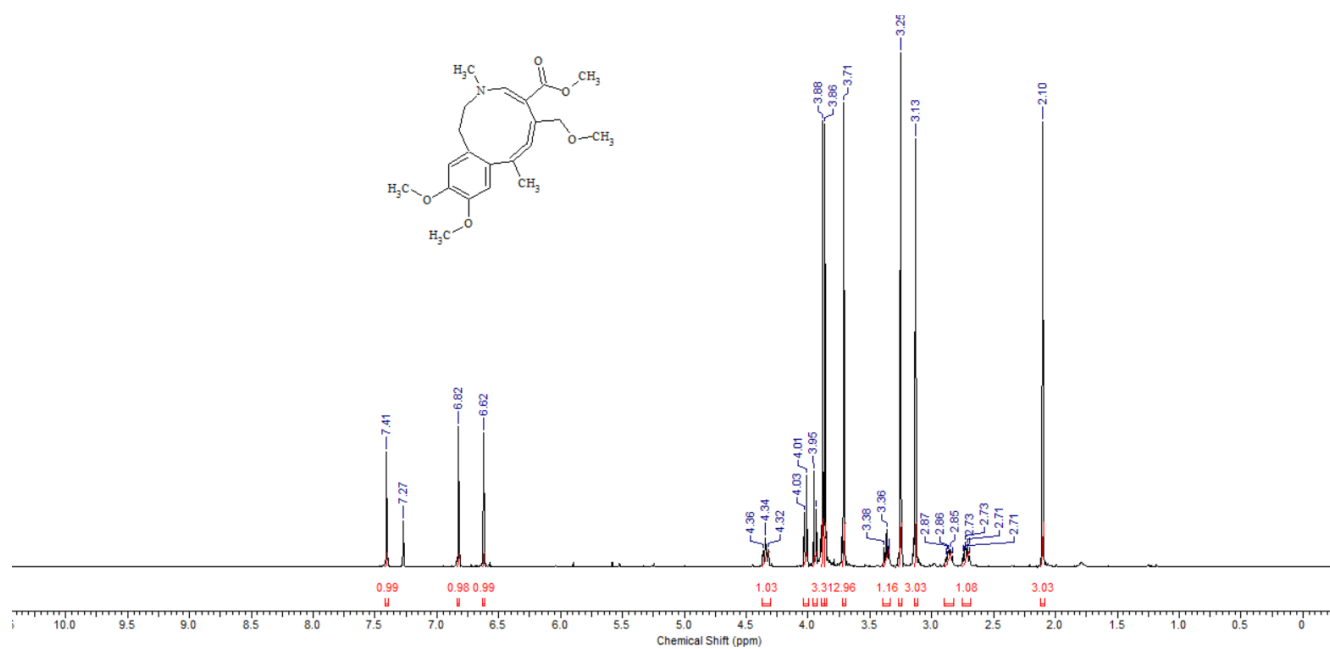

**Figure S17:**  $^1\text{H}$  NMR spectrum of compound **3a**

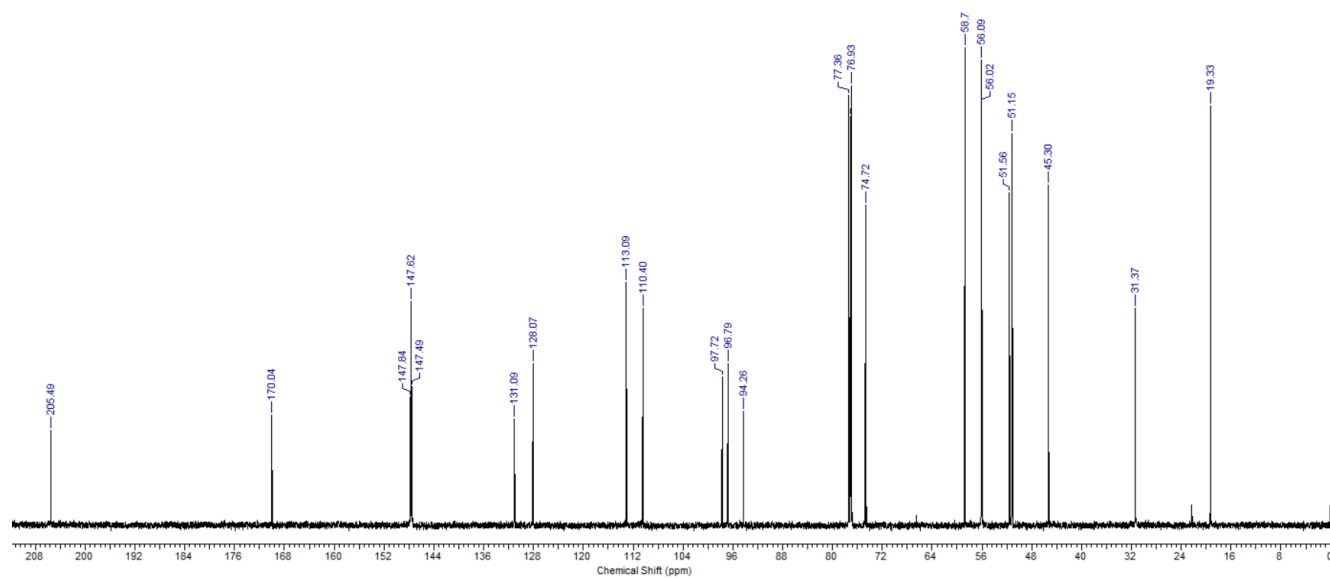

**Figure S18:**  $^{13}\text{C}$  NMR spectrum of compound **3a**

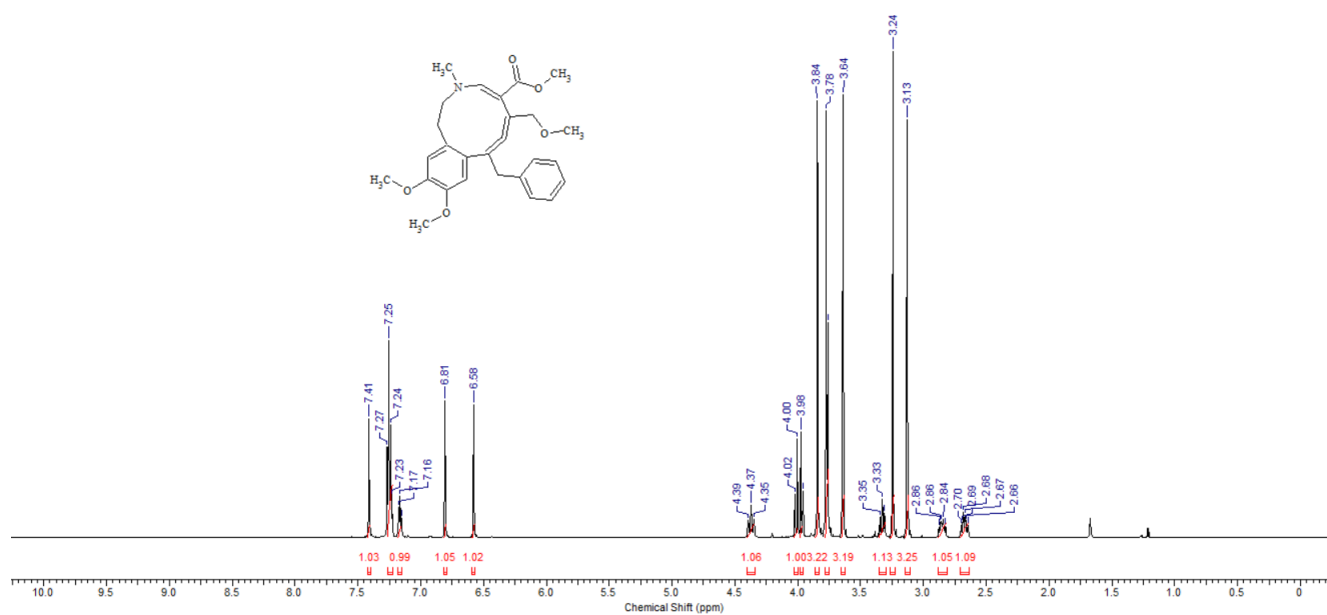

**Figure S19:**  $^1\text{H}$  NMR spectrum of compound **3b**

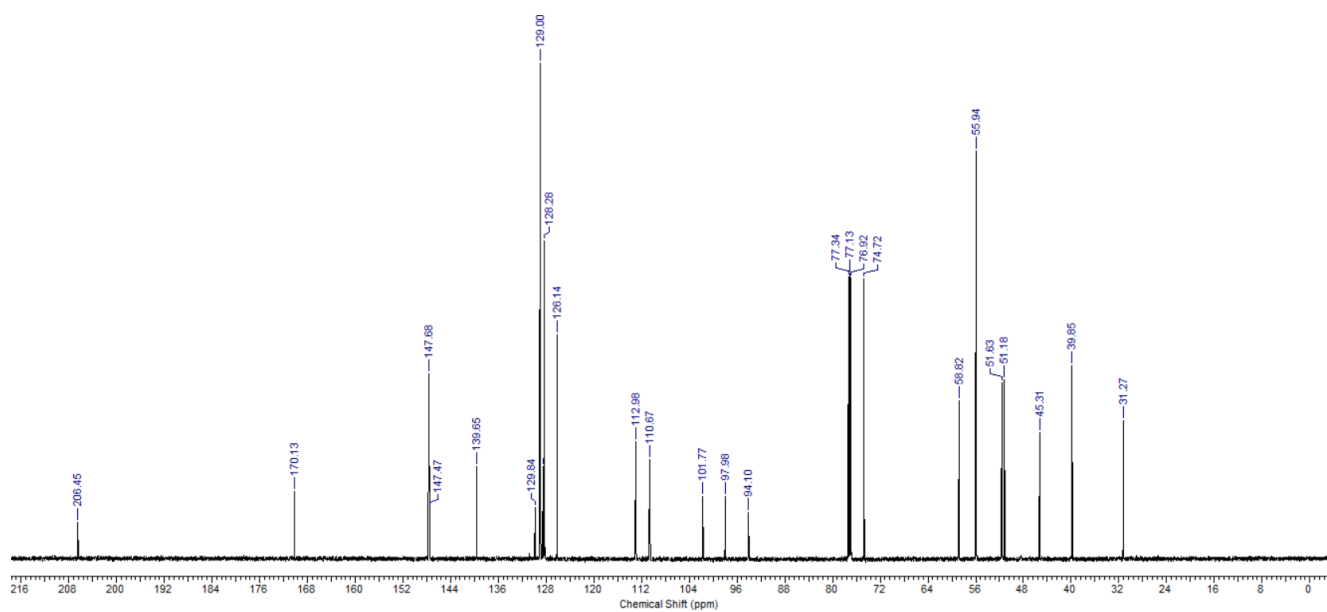

**Figure S20:**  $^{13}\text{C}$  NMR spectrum of compound **3b**

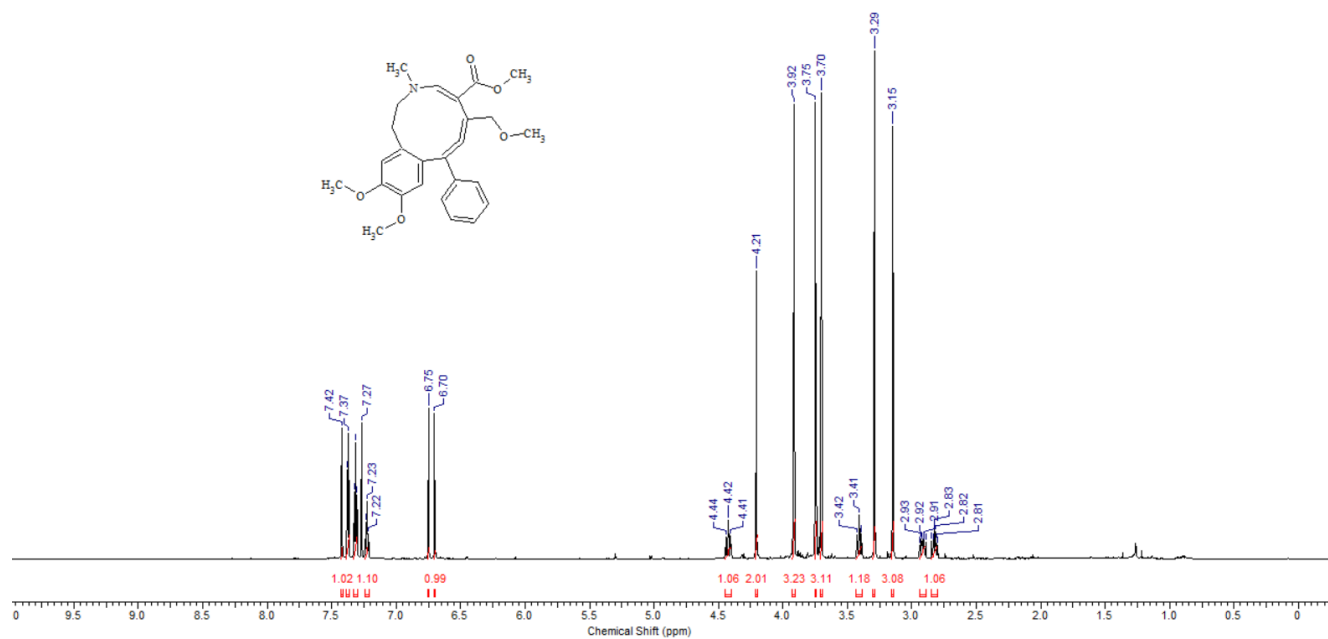

**Figure S21:** <sup>1</sup>H NMR spectrum of compound **3c**

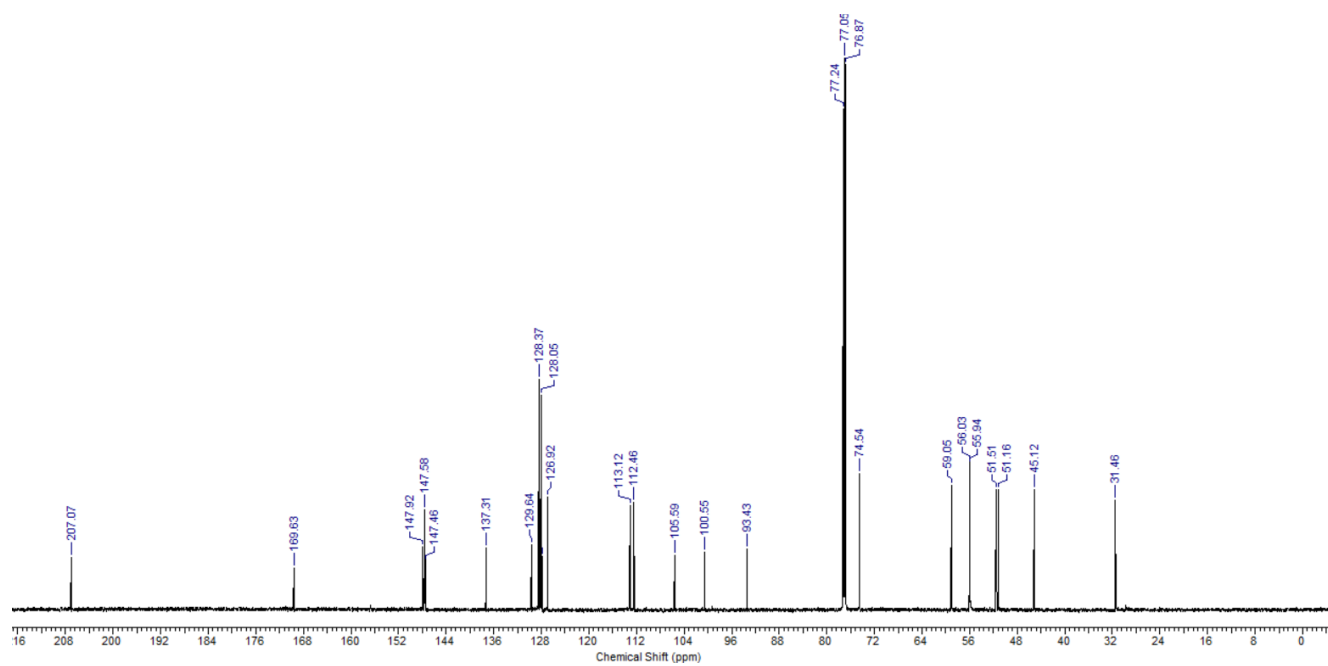

**Figure S22:** <sup>13</sup>C NMR spectrum of compound **3c**

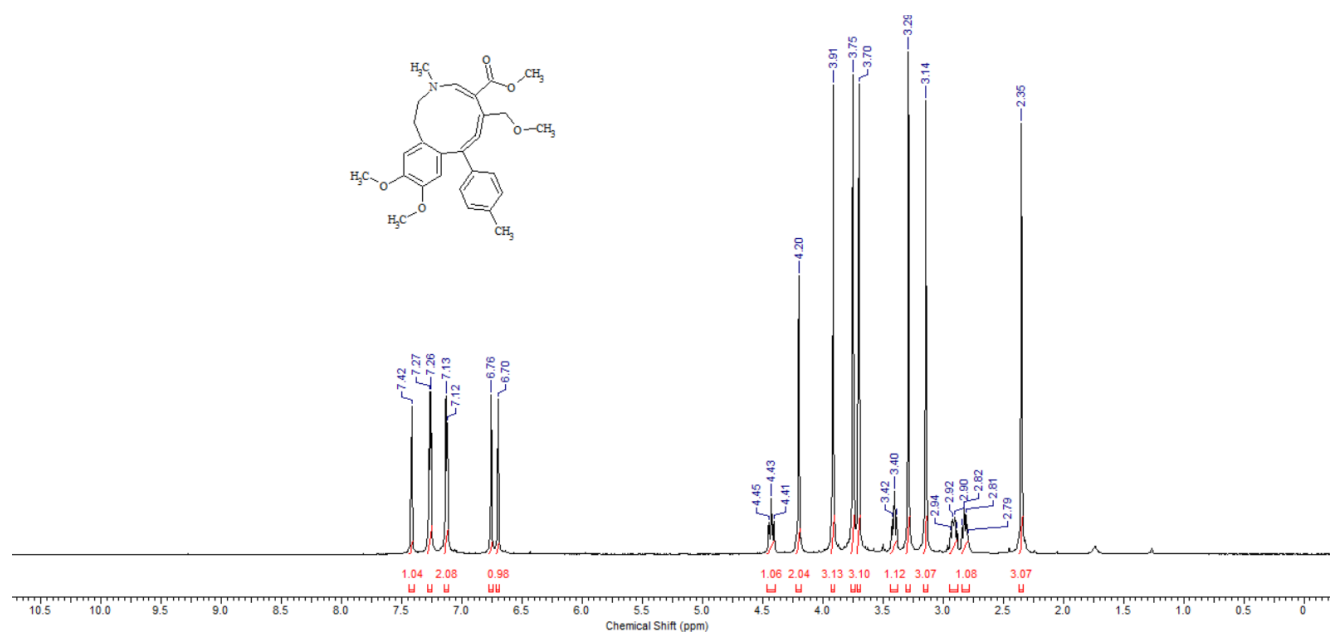

**Figure S23:**  $^1\text{H}$  NMR spectrum of compound **3d**

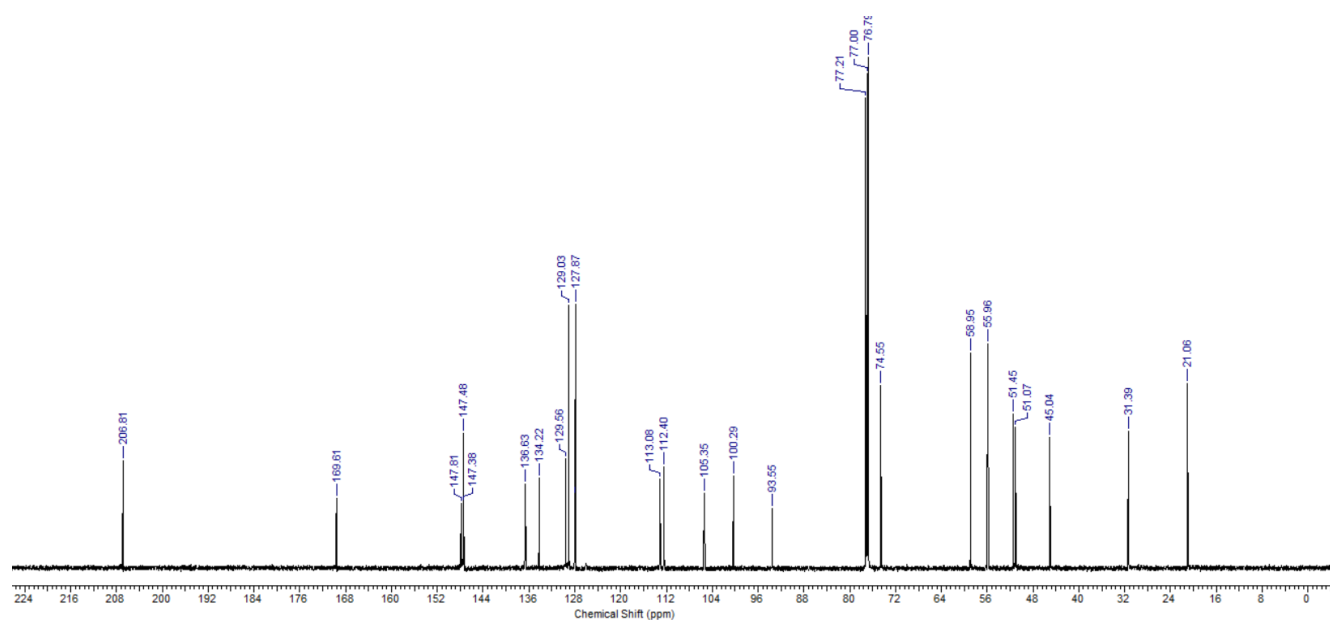

**Figure S24:**  $^{13}\text{C}$  NMR spectrum of compound **3d**

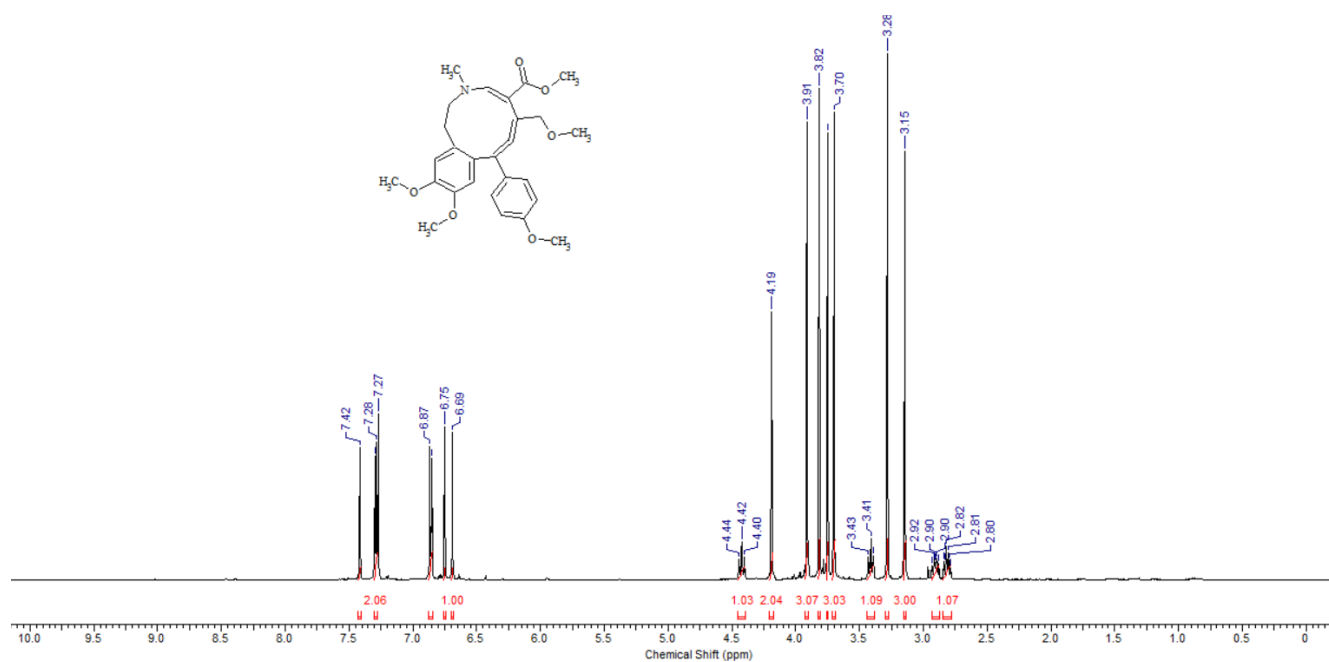

**Figure S25:**  $^1\text{H}$  NMR spectrum of compound **3e**

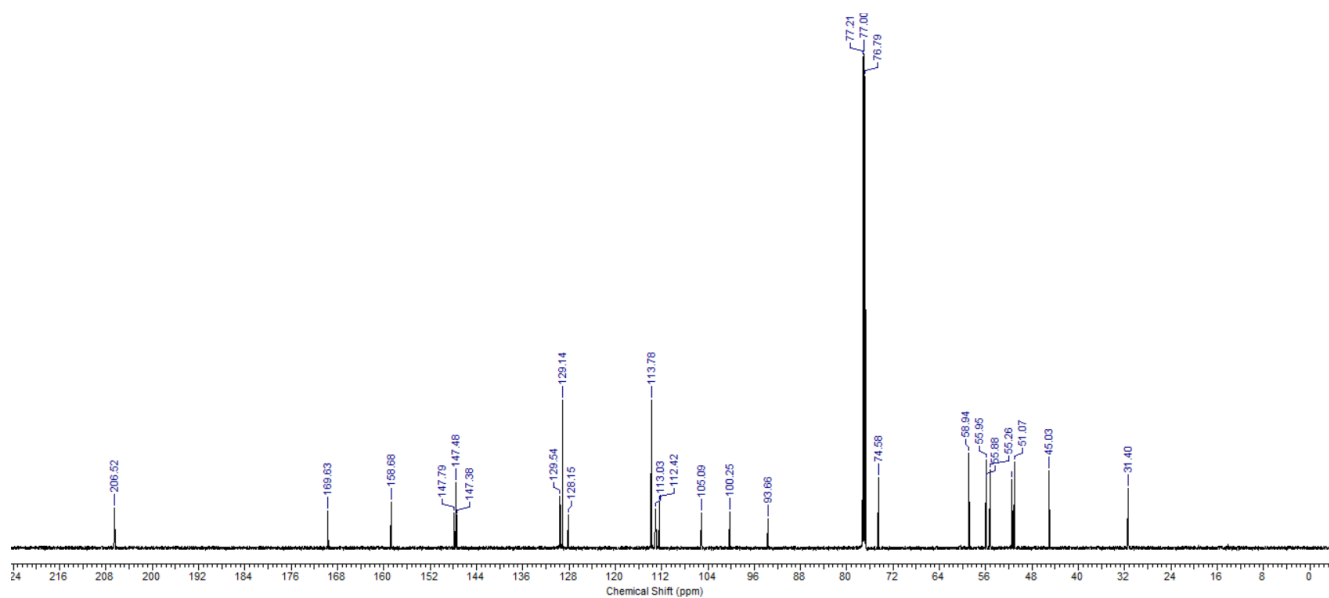

**Figure S26:**  $^{13}\text{C}$  NMR spectrum of compound **3e**

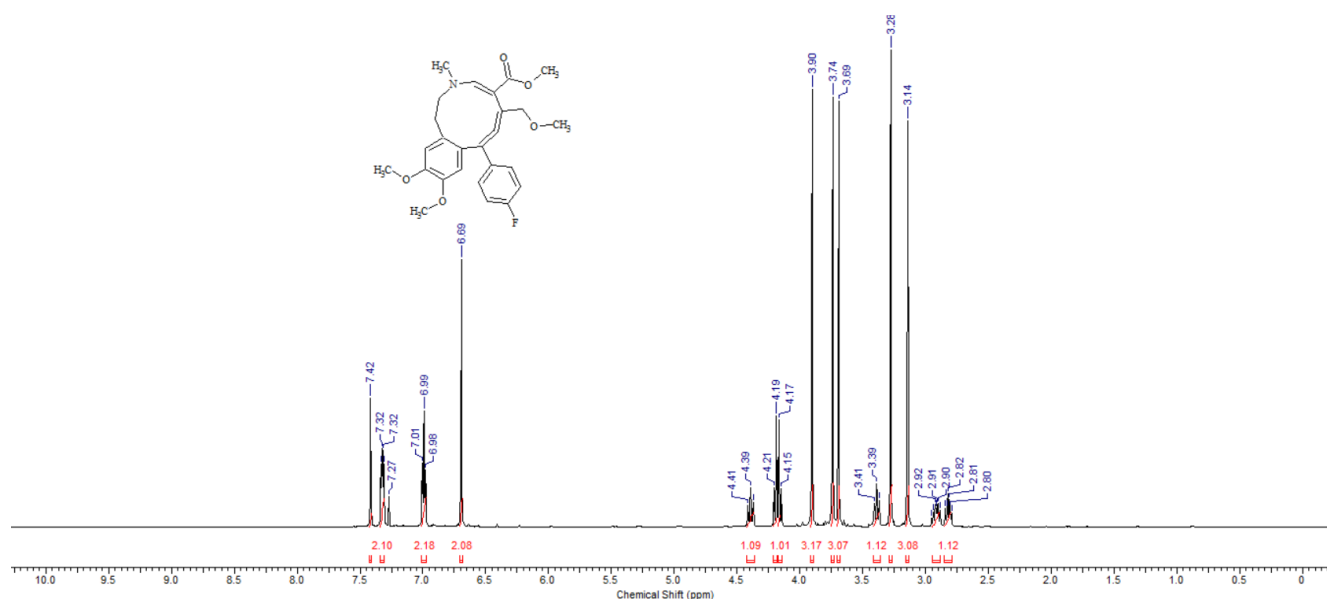

**Figure S27:**  $^1\text{H}$  NMR spectrum of compound **3f**

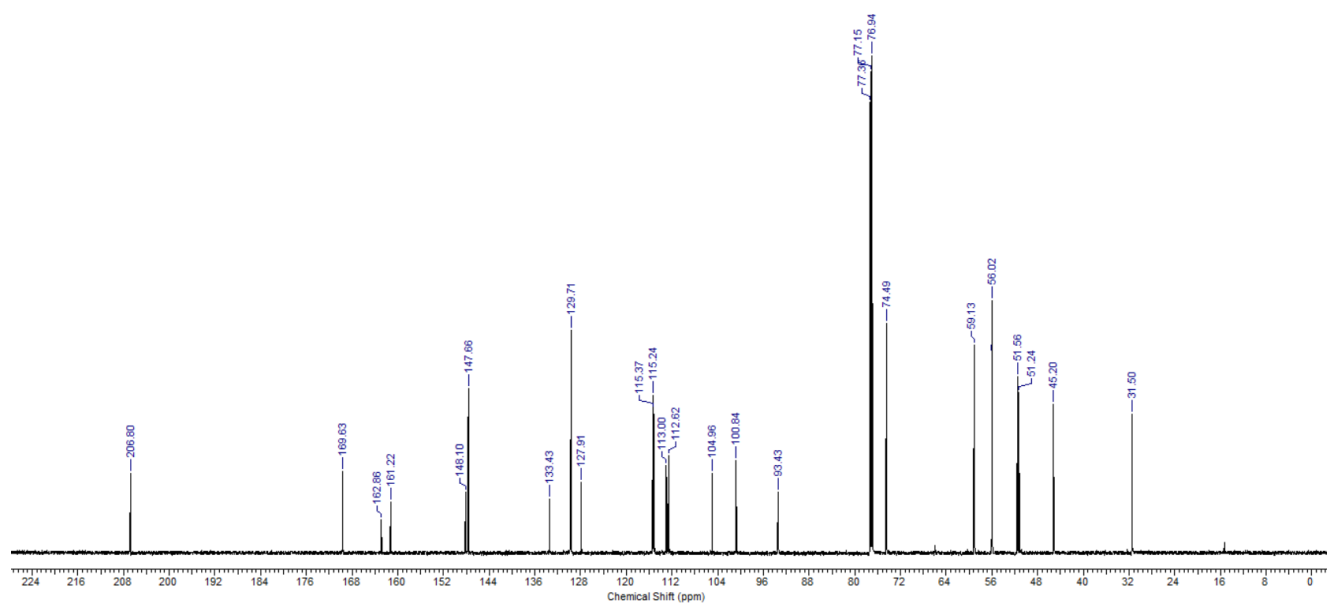

**Figure S28:**  $^{13}\text{C}$  NMR spectrum of compound **3f**

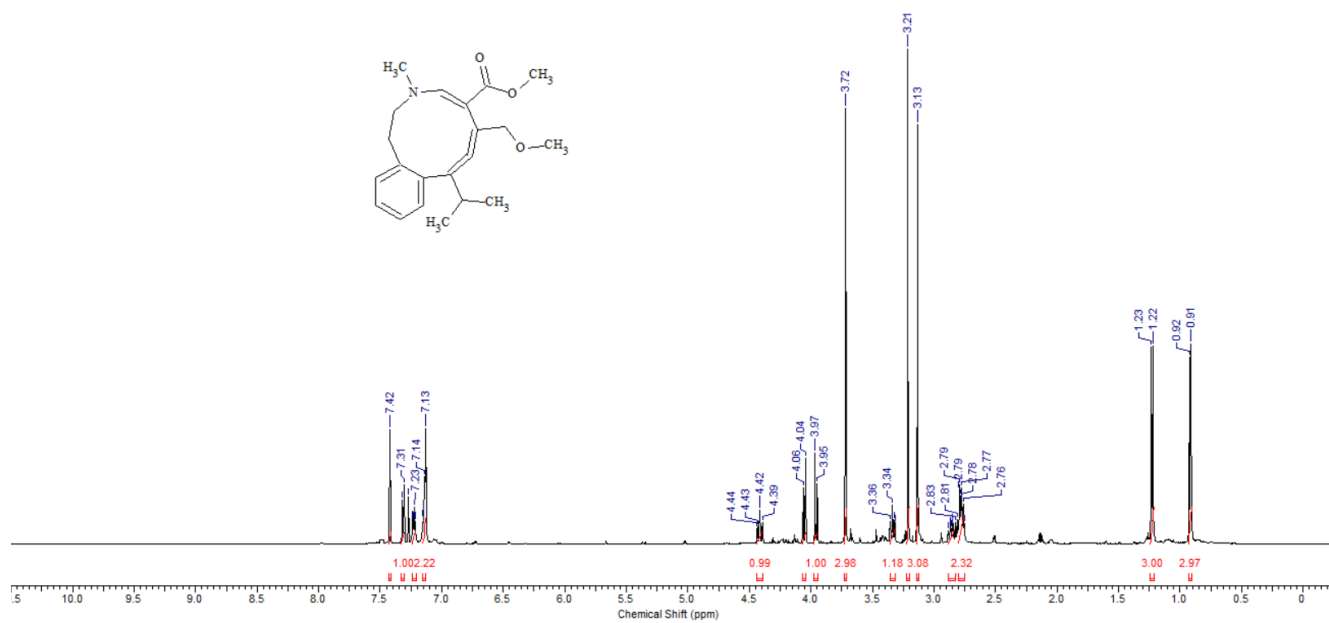

**Figure S29:**  $^1\text{H}$  NMR spectrum of compound **3g**

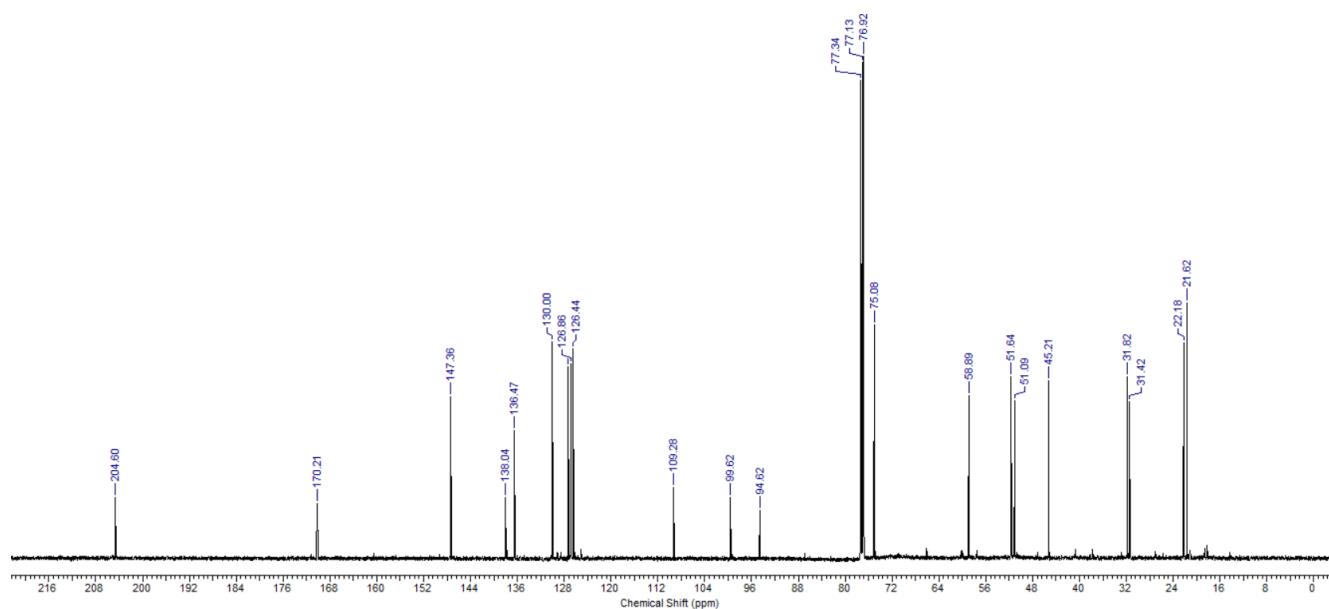

**Figure S30:**  $^{13}\text{C}$  NMR spectrum of compound **3g**



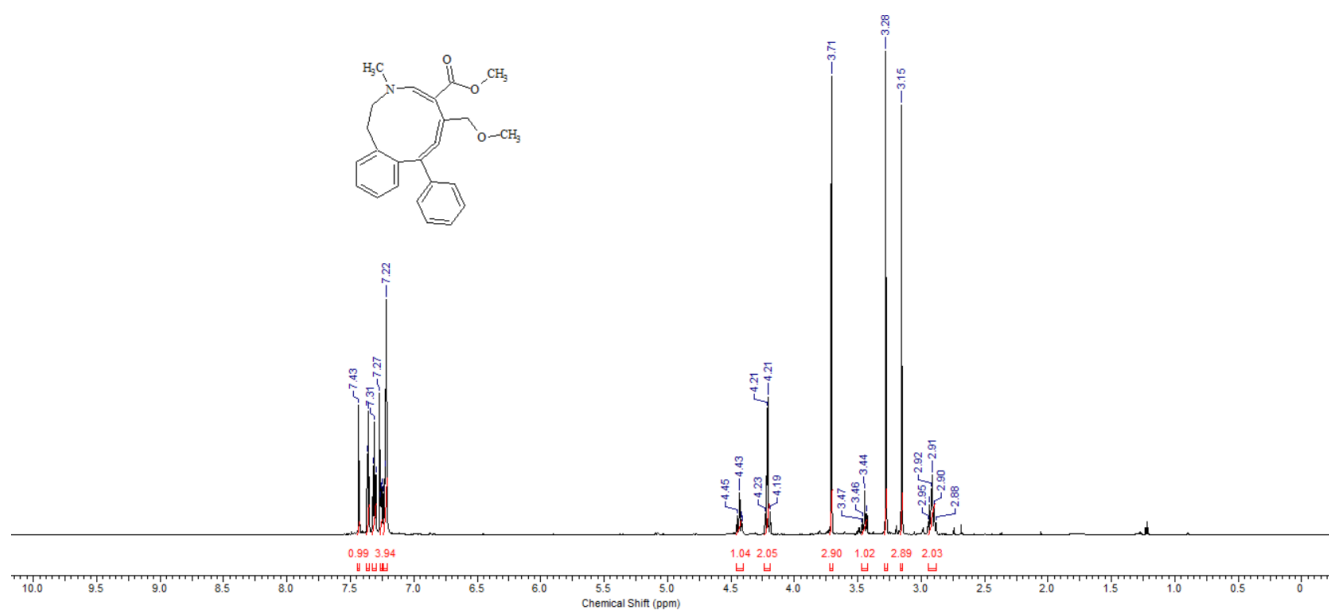

**Figure S31:** <sup>1</sup>H NMR spectrum of compound **3h**

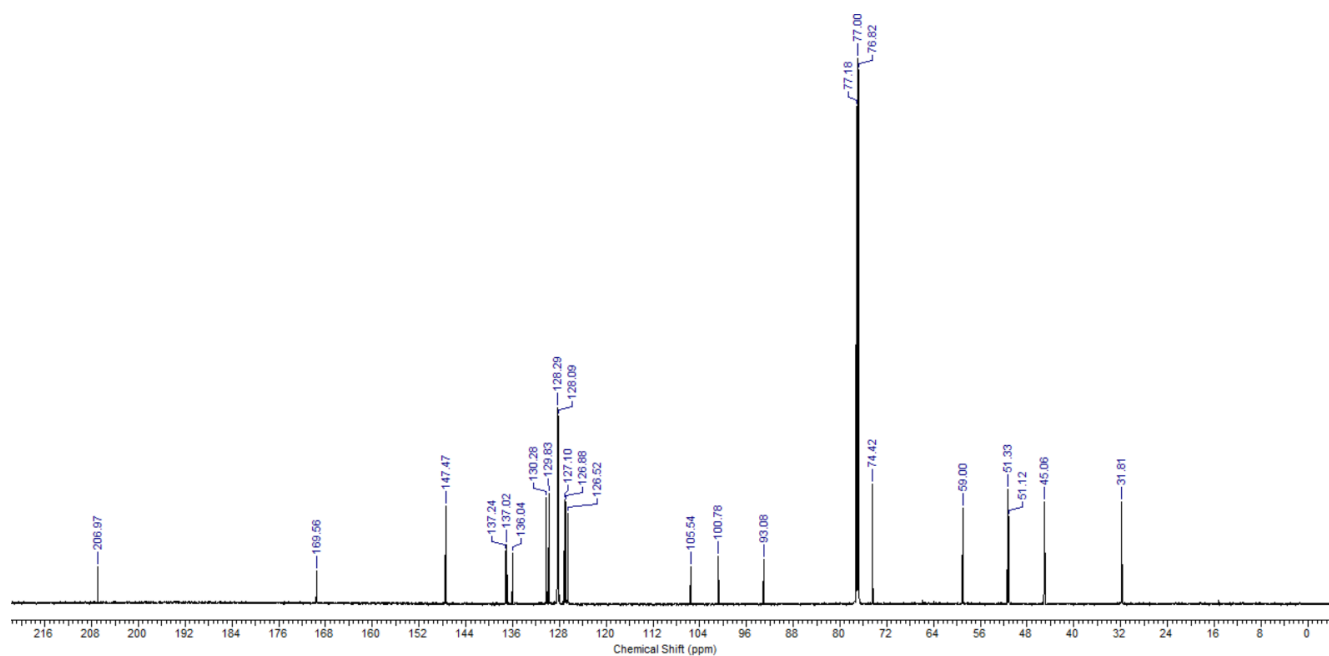

**Figure S32:** <sup>13</sup>C NMR spectrum of compound **3h**

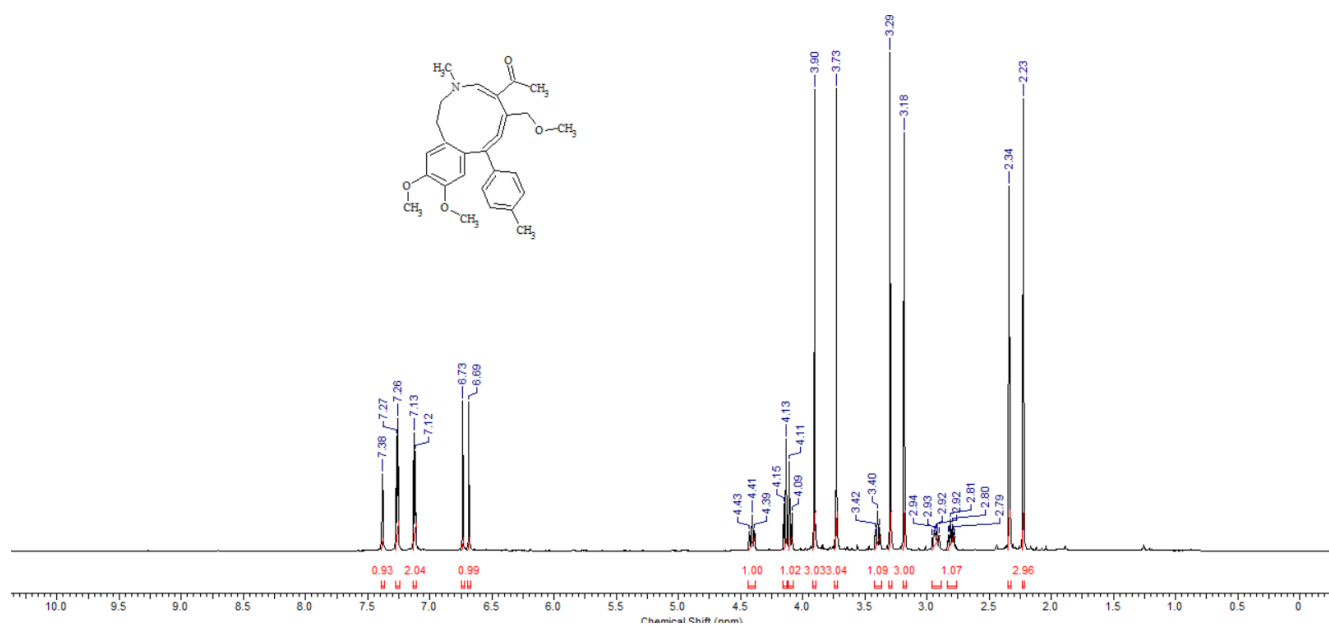

**Figure S33:**  $^1\text{H}$  NMR spectrum of compound **3i**

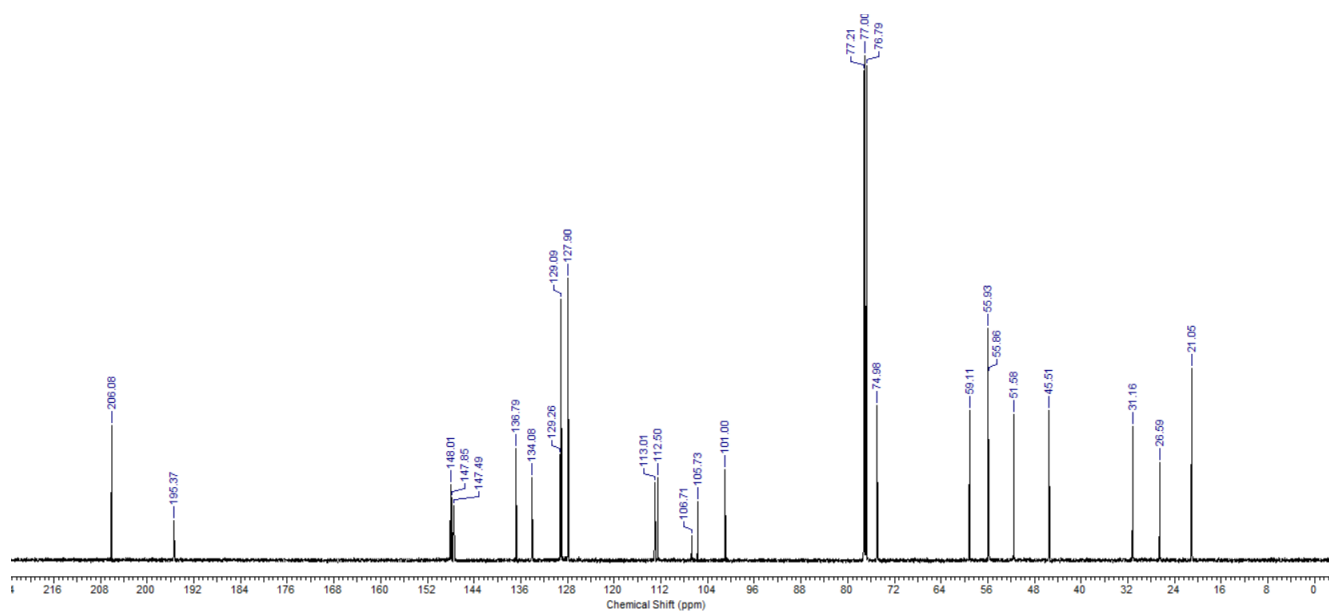

**Figure S34:**  $^{13}\text{C}$  NMR spectrum of compound **3i**

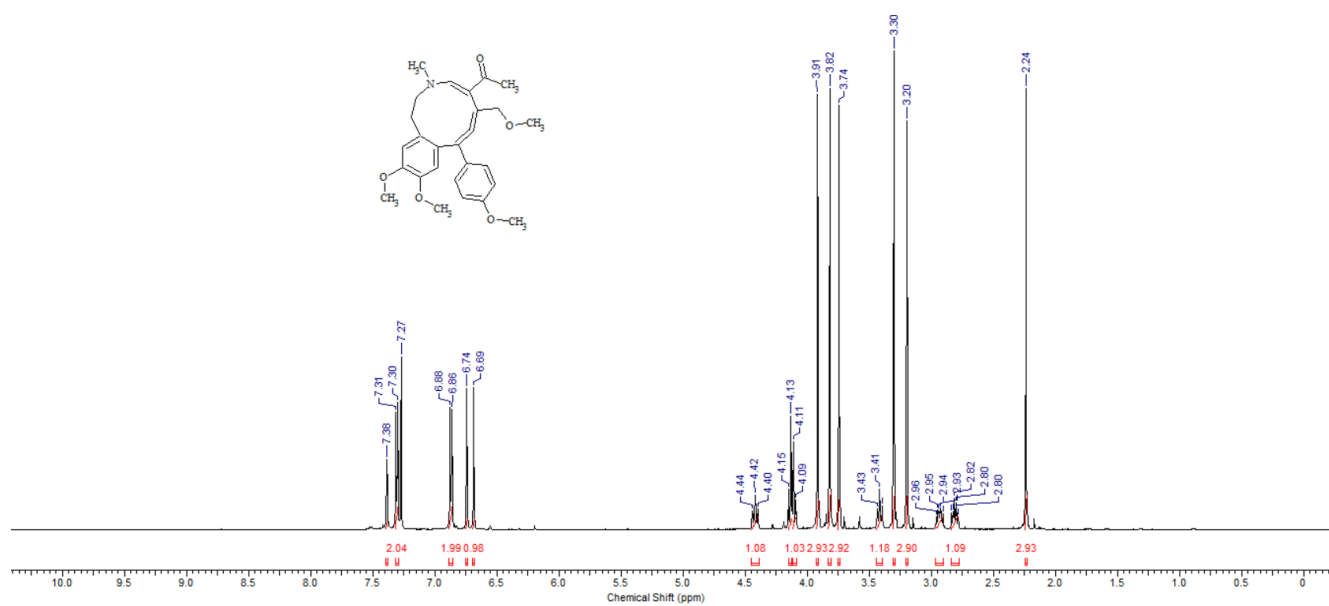

**Figure S35:**  $^1\text{H}$  NMR spectrum of compound **3j**

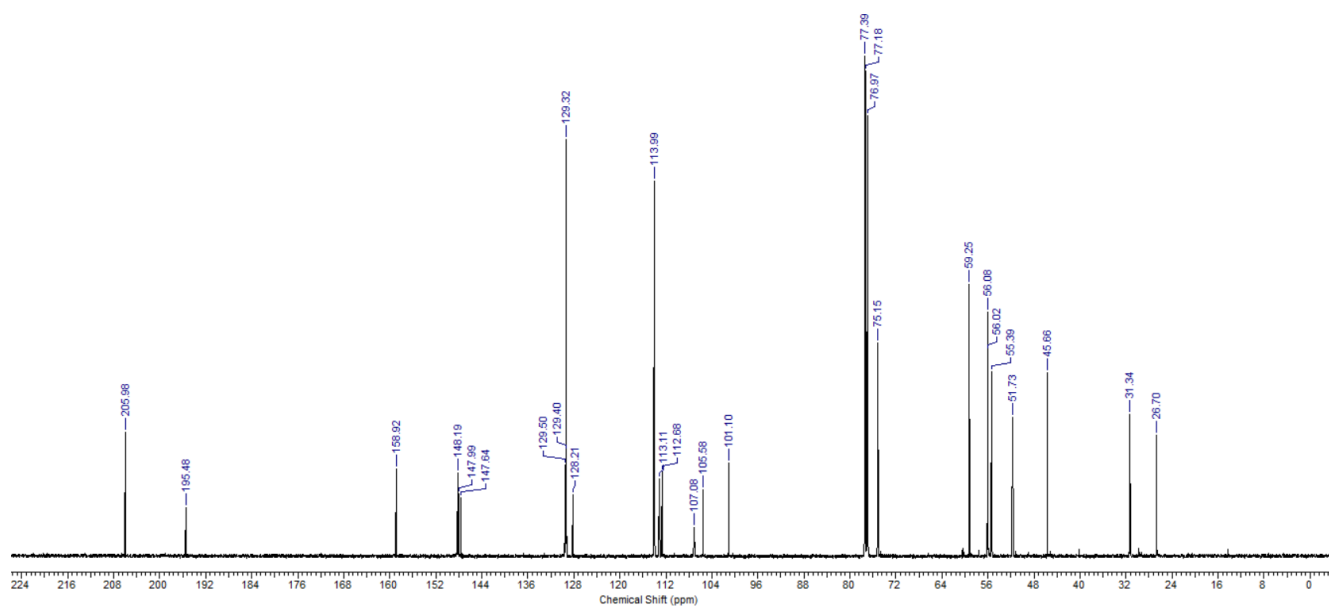

**Figure S36:**  $^{13}\text{C}$  NMR spectrum of compound **3j**

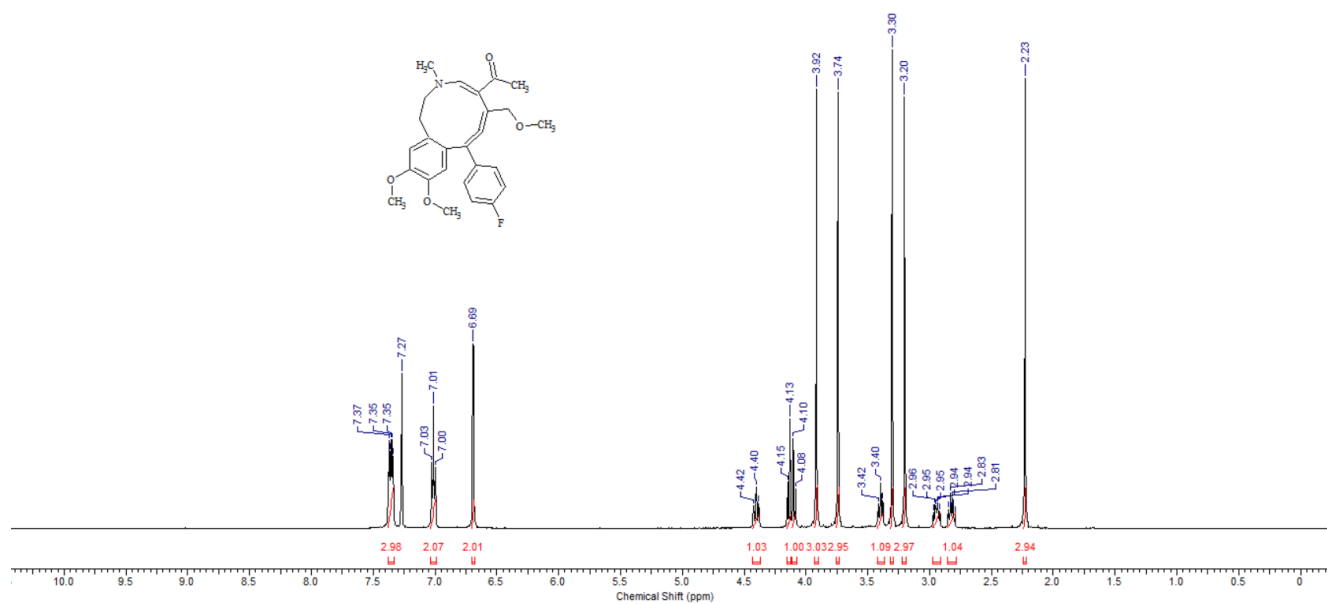

**Figure S37:**  $^1\text{H}$  NMR spectrum of compound **3k**

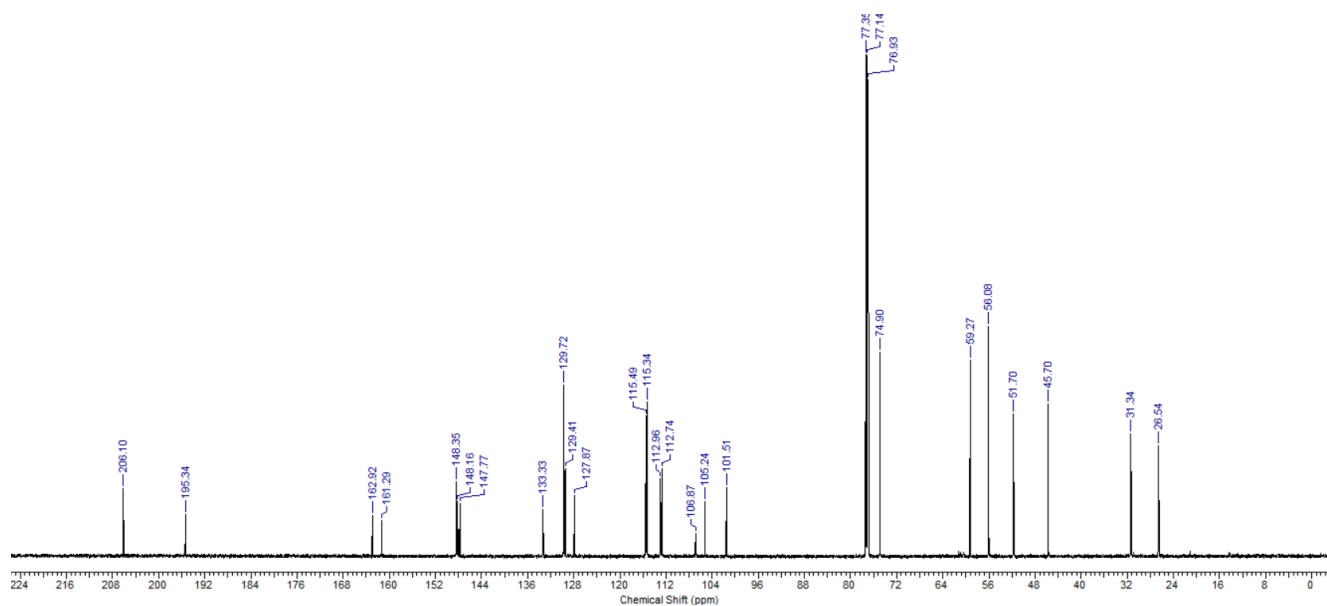

**Figure S38:**  $^{13}\text{C}$  NMR spectrum of compound **3k**

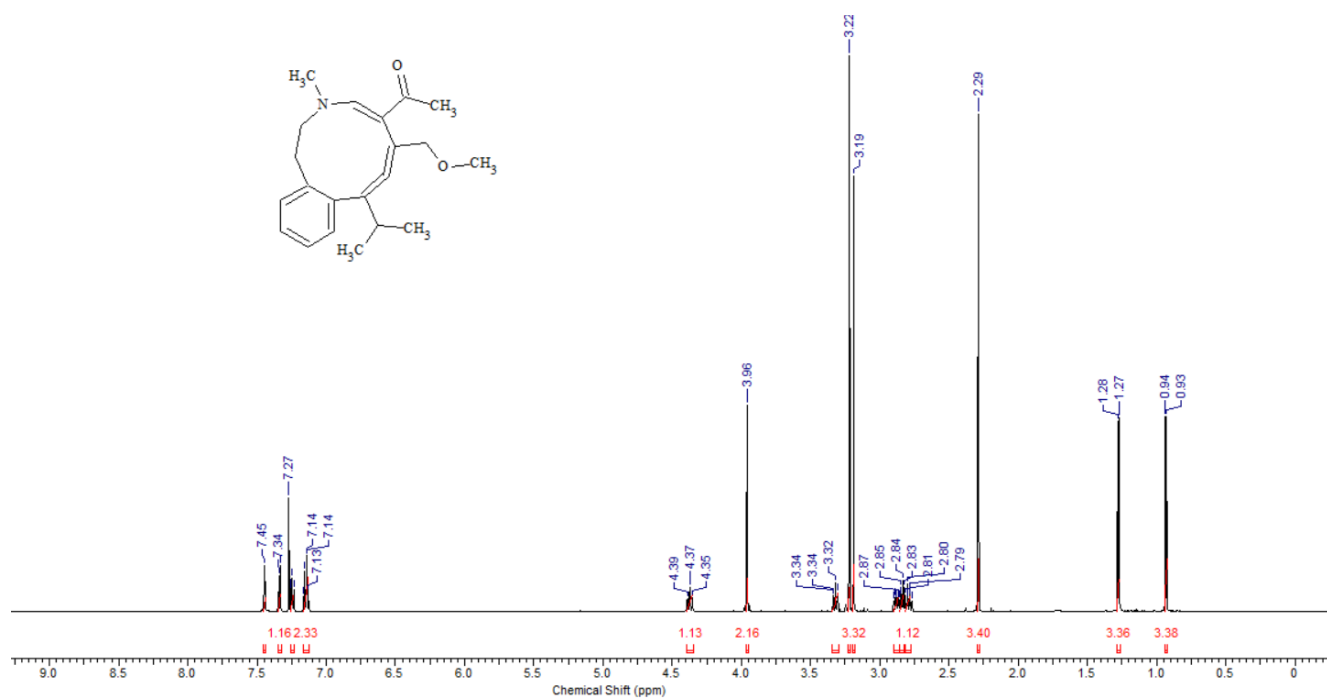

**Figure S39:**  $^1\text{H}$  NMR spectrum of compound **3I**

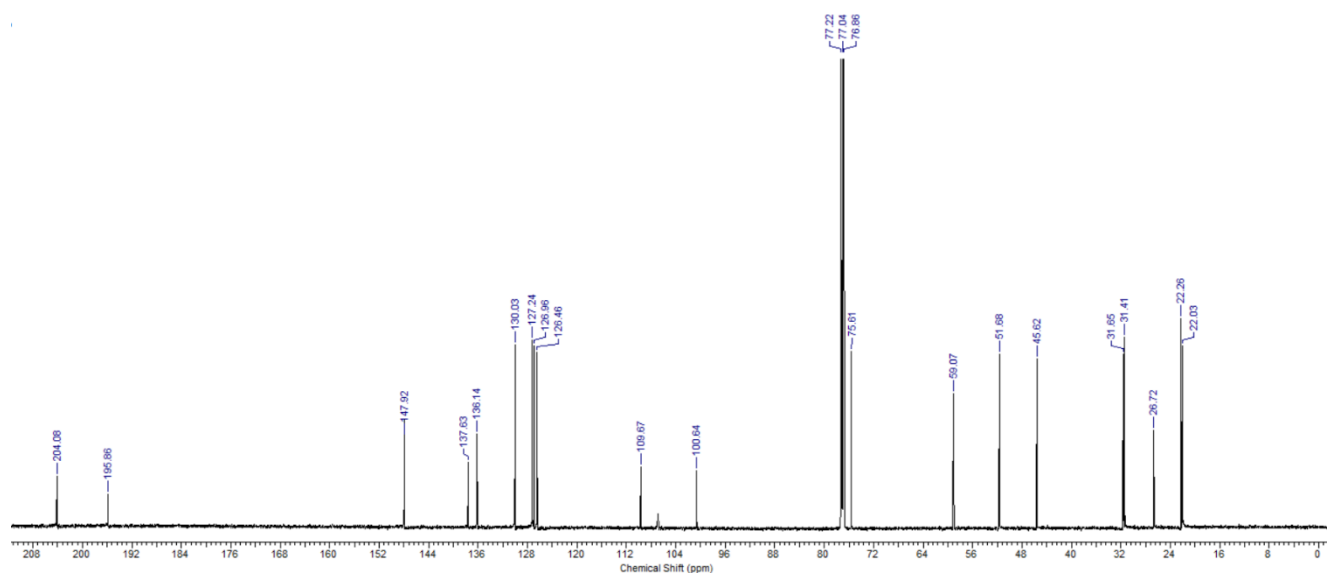

**Figure S40:**  $^{13}\text{C}$  NMR spectrum of compound **3I**

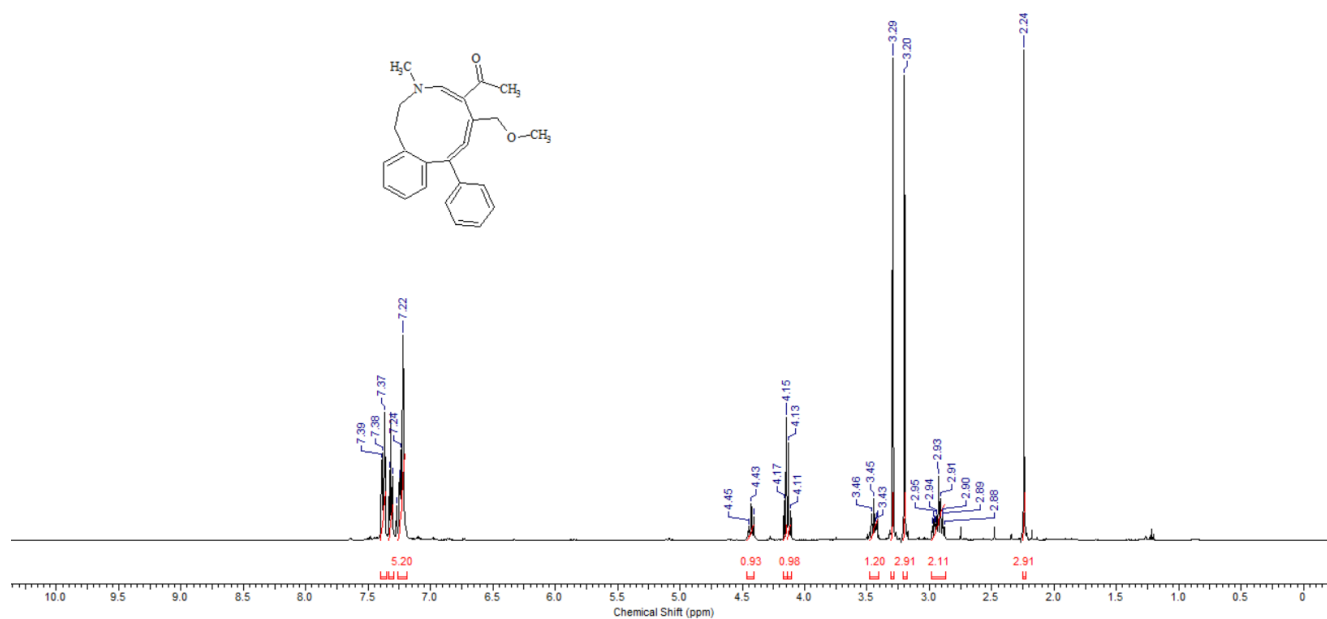

**Figure S41:** <sup>1</sup>H NMR spectrum of compound **3m**

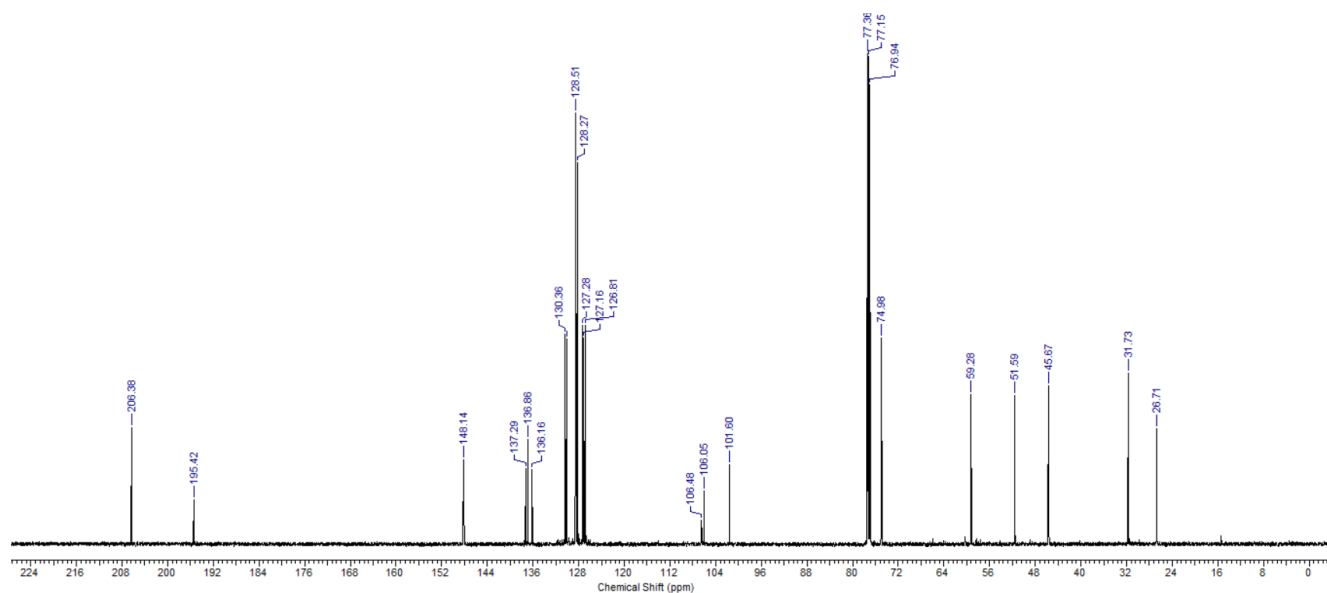

**Figure S42:** <sup>13</sup>C NMR spectrum of compound **3m**

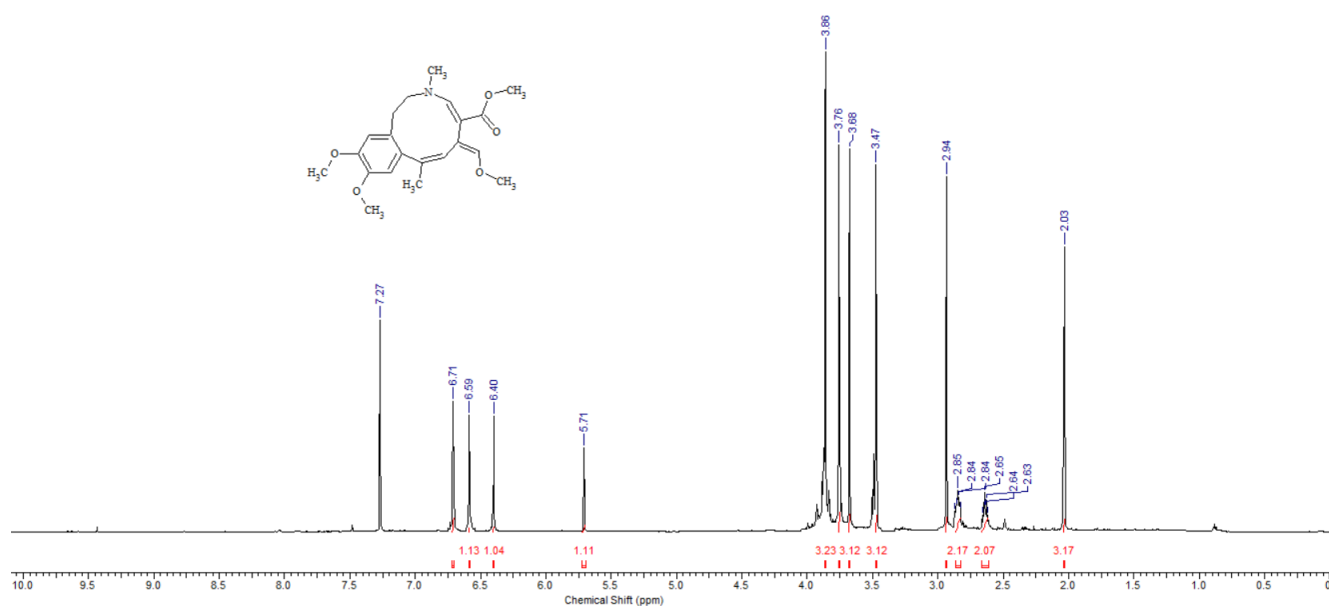

**Figure S43:** <sup>1</sup>H NMR spectrum of compound 4a

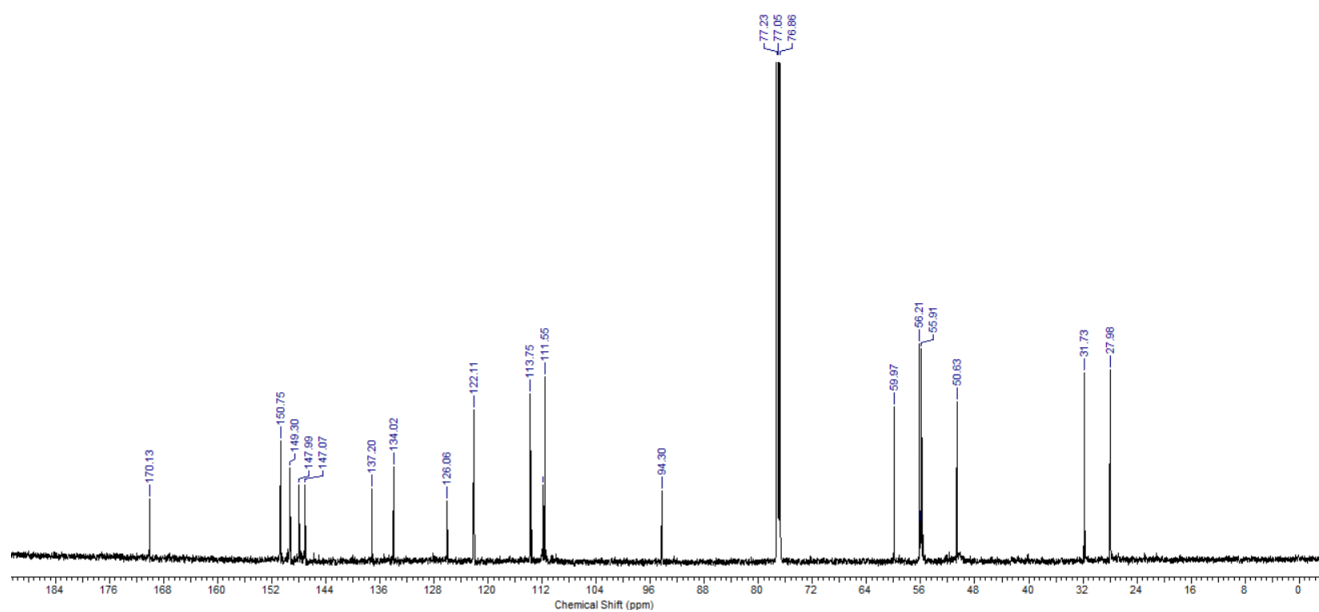

**Figure S44:** <sup>13</sup>C NMR spectrum of compound 4a

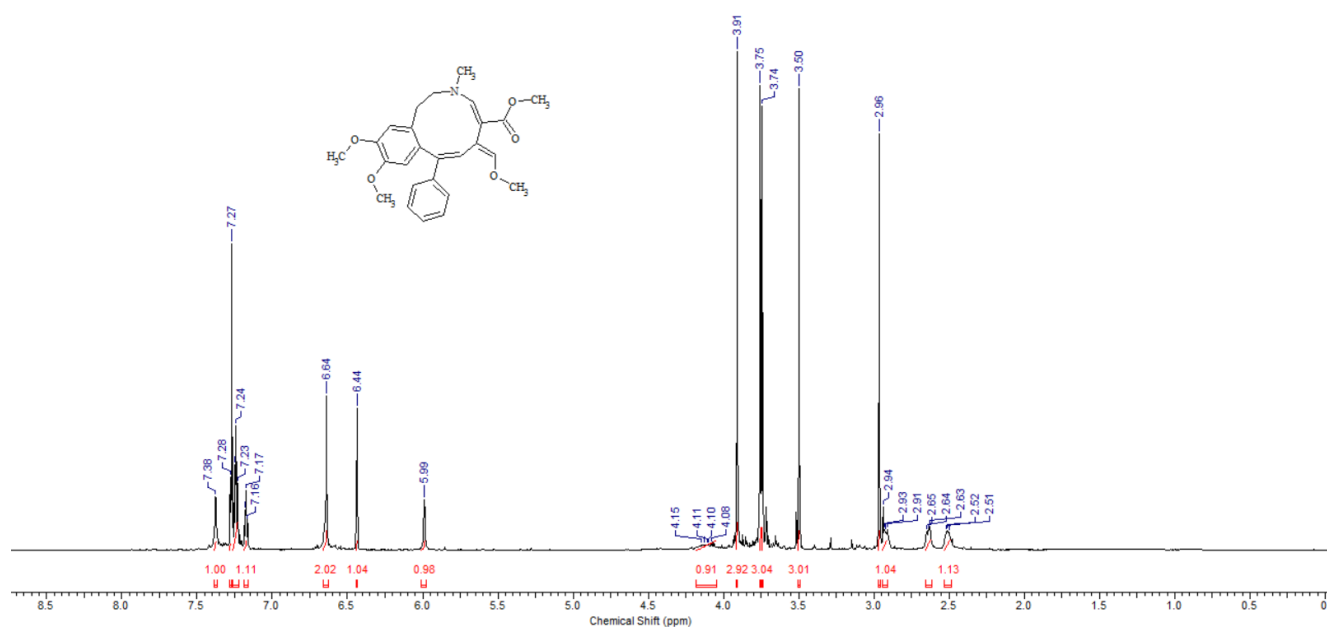

**Figure S45:** <sup>1</sup>H NMR spectrum of compound 4c

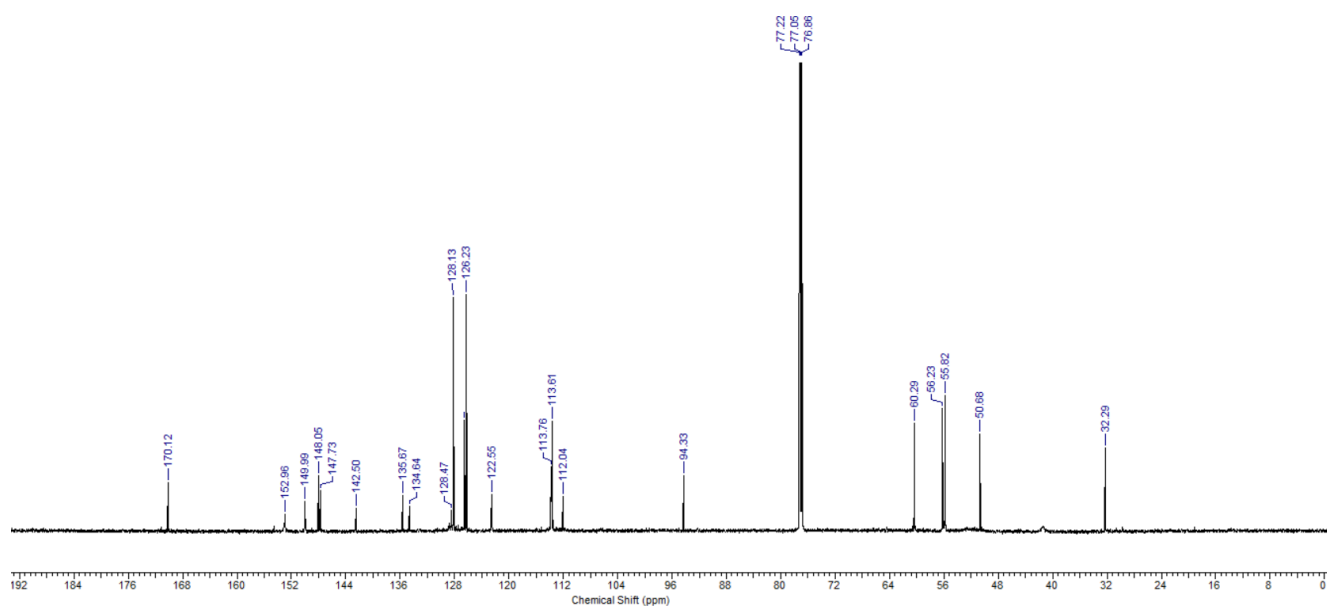

**Figure S46:** <sup>13</sup>C NMR spectrum of compound 4c



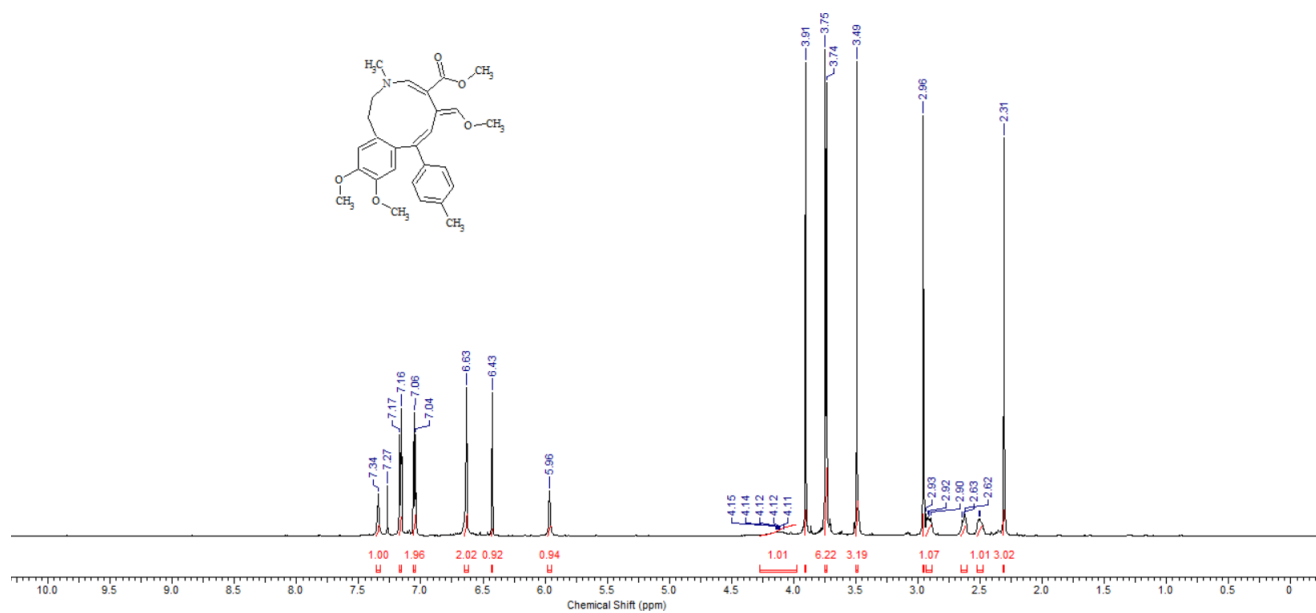

**Figure S47:** <sup>1</sup>H NMR spectrum of compound **4d**

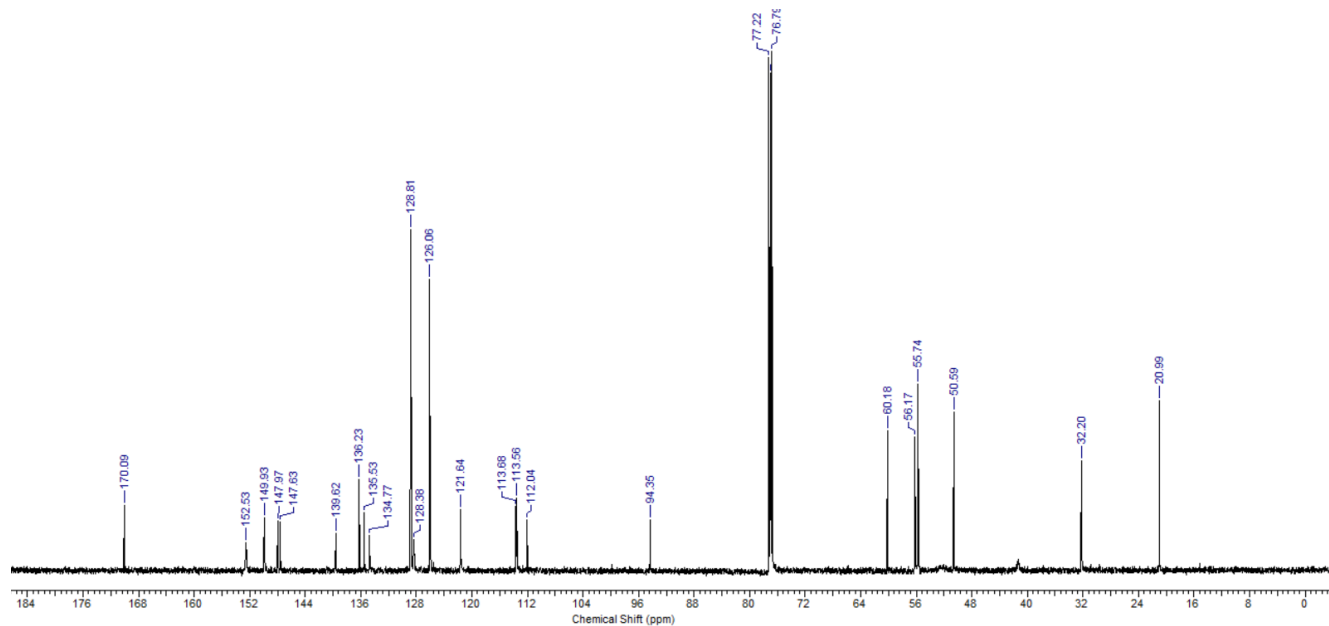

**Figure S48:** <sup>13</sup>C NMR spectrum of compound **4d**

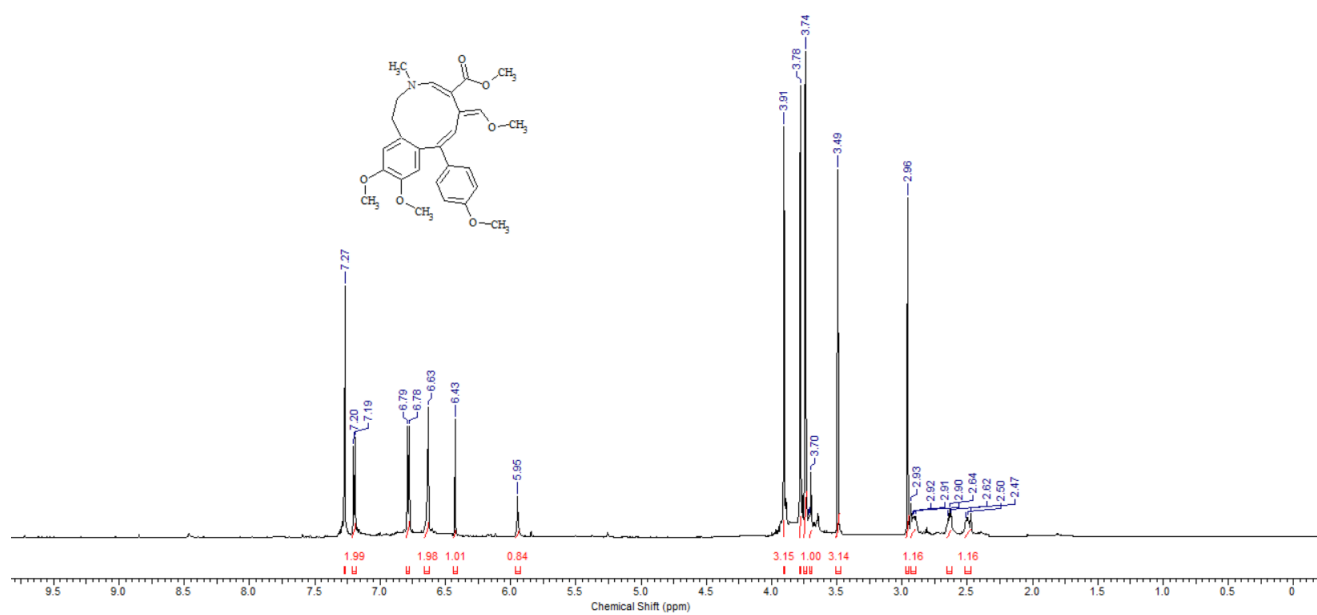

**Figure S49:**  $^1\text{H}$  NMR spectrum of compound 4e

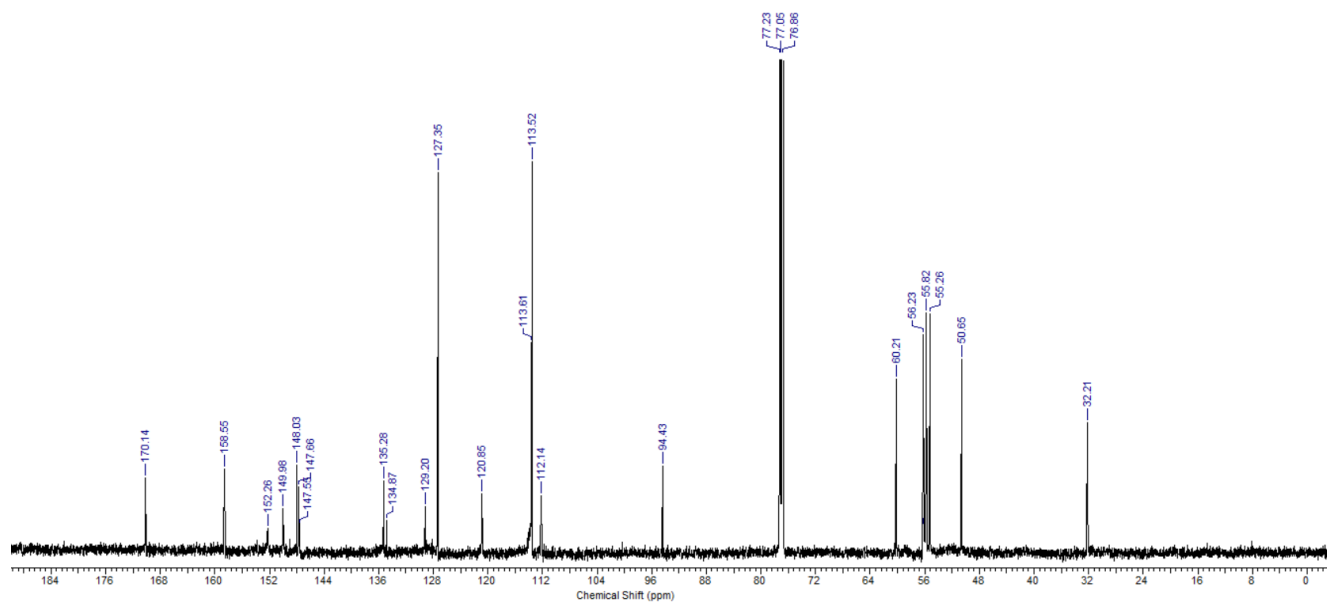

**Figure S50:**  $^{13}\text{C}$  NMR spectrum of compound 4e

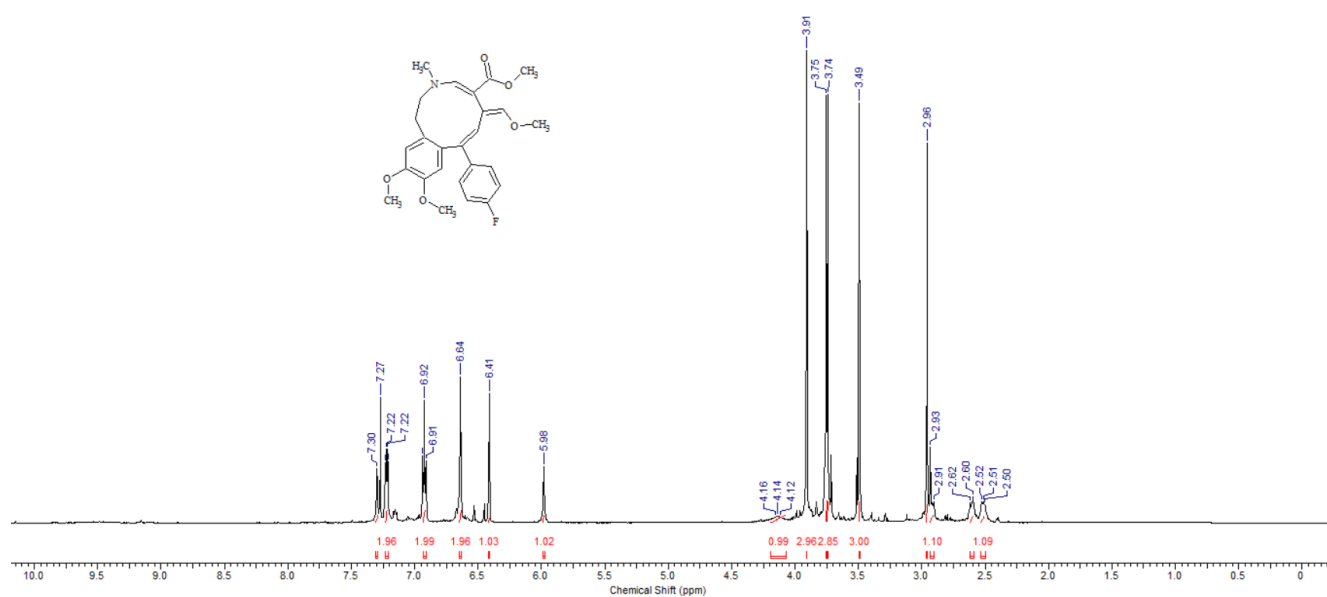

**Figure S51:** <sup>1</sup>H NMR spectrum of compound **4f**

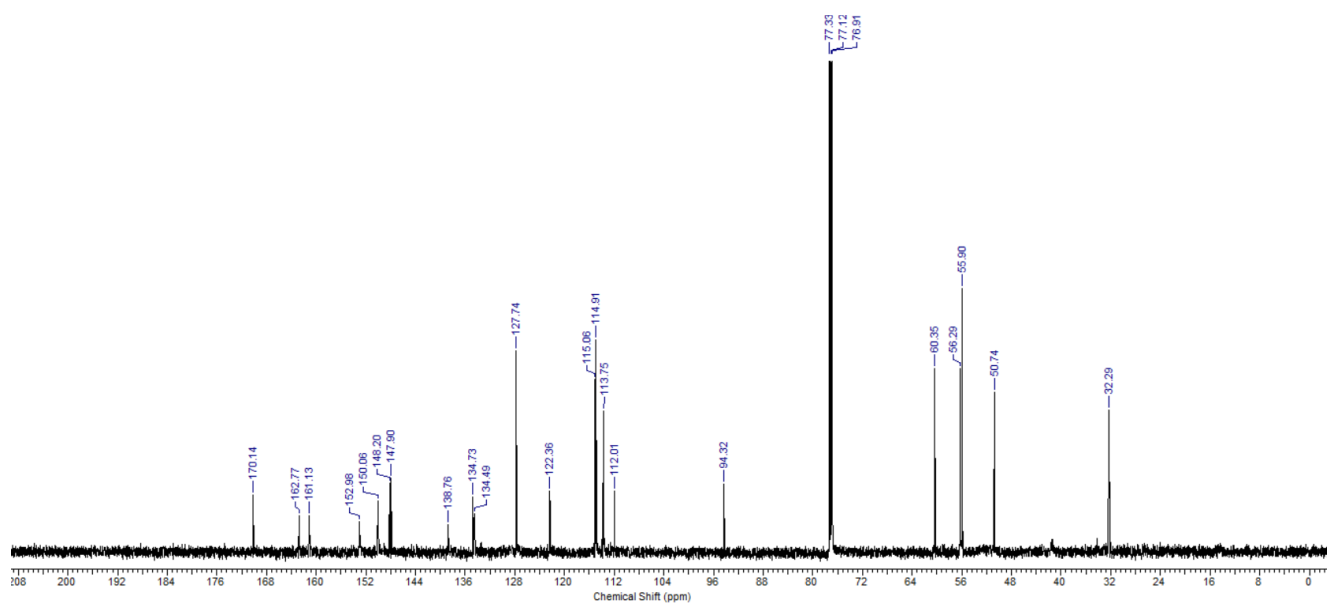

**Figure S52:** <sup>13</sup>C NMR spectrum of compound **4f**
